# Supplementary material for: Evidence for a Role for Interleukin-17, Th17 Cells and Iron Homeostasis in Protective Immunity against Tuberculosis in Cynomolgus Macaques
Source: PLoS One. 2014 Feb 4;9(2):e88149. doi: 10.1371/journal.pone.0088149 (PMC3913765; doi:10.1371/journal.pone.0088149)
Supplement: Table S2 — List of genes found to be differentially expressed in PPD-stimulated PBMCs isolated 6 weeks post- M. tuberculosis challenge in unvaccinated cynomolgus macaques able to control infection (unvaccinated controllers (n = 3)). (XLSX) [file pone.0088149.s002.xlsx]

## Sheet: Sheet1
Table S2.
Differentially expressed genes in PPD-stimulated PBMCs isolated at 6 weeks post-challenge in cynomolgus unvaccinated controllers
(Post-challenge vs naive)
Agilent Probe ID	Gene Symbol	Gene Name	Fold Change from Naive	Corrected P-value
A_01_P019234	CXCL9	chemokine (C-X-C motif) ligand 9	41.2637	8.09697e-05
A_01_P005324	CXCL11	chemokine (C-X-C motif) ligand 11	19.1305	6.3457e-05
A_01_P019515	LOC708678	interleukin-27 subunit alpha-like	15.7232	0.000200454
A_01_P016778	LOC708983	metallothionein-2-like	12.1911	0.000994567
A_01_P000478	IFNG	interferon-gamma	11.0118	0.00139049
A_01_P016456	LOC713160	DNA-binding protein inhibitor ID-1-like	10.9802	0.00206828
A_01_P001065	LOC708983	metallothionein-2-like	8.93075	0.000583629
A_01_P010402	IL12B	interleukin 12B	8.72075	0.000447134
A_01_P012055	GATA2	GATA binding protein 2	8.36276	0.0059425
A_01_P002255	HES1	hairy and enhancer of split 1, (Drosophila)	7.63903	0.0019097
A_01_P014389	ADM	adrenomedullin	7.52968	0.000595118
A_01_P017416	SCTR	secretin receptor	7.37369	0.00551764
A_01_P012021	CROC4	transcriptional activator of the c-fos promoter	7.04049	0.00239987
A_01_P008690	LOC100426039	aquaporin-12-like	6.71773	0.000897812
A_01_P006717	CLEC9A	C-type lectin domain family 9, member A	6.69203	0.00476868
A_01_P018791	S100P	S100 calcium binding protein P	6.66169	0.0011241
A_01_P003770	CA2	carbonic anhydrase II	6.35012	0.00315892
A_01_P005090	CPXM1	carboxypeptidase X (M14 family), member 1	6.29776	0.000900358
A_01_P000187	C2CD4A	C2 calcium-dependent domain containing 4A	6.27146	6.63295e-05
A_01_P011451	LOC719501	t-cell antigen CD7-like.	6.25407	6.3457e-05
A_01_P011214	SNAI1	snail homolog 1 (Drosophila)	6.15682	0.00252042
A_01_P017394	IL2	interleukin 2	6.11539	0.00319897
A_01_P000247	LOC719036	pleckstrin homology-like domain, family A, member 1	6.06929	0.000720516
A_01_P012338	CCL20	chemokine (C-C motif) ligand 20	5.99002	0.00414934
A_01_P015552	KCTD14	potassium channel tetramerisation domain containing 14	5.9892	0.000716265
A_01_P004043	IL21	interleukin 21	5.82416	0.00932673
A_01_P015977	APOL6	apolipoprotein L6-like	5.76973	7.6733e-05
A_01_P009768	TNFAIP6	tumor necrosis factor, alpha-induced protein 6	5.75749	0.00196033
A_01_P010790	LOC711776	succinate receptor 1-like	5.60294	0.000336483
A_01_P003117	PTGES	prostaglandin E synthase	5.56262	0.00168056
A_01_P011253	PTX3	pentraxin 3, long	5.46826	0.00420299
A_01_P011458	PLK2	polo-like kinase 2	5.39243	0.00378073
A_01_P011939	CITED4	cbp/p300-interacting transactivator 4-like	5.33169	0.000248313
A_01_P008884	IL1RN	interleukin 1 receptor antagonist	5.33042	0.009743
A_01_P014084	LOC718270	protein S100-A5-like	5.32181	0.000463108
A_01_P005542	F8A1	coagulation factor VIII-associated 1	5.26725	0.000227002
A_01_P006184	MSR1	macrophage scavenger receptor 1	5.24654	0.00372771
A_01_P007507	IGDCC3	immunoglobulin superfamily, DCC subclass, member 3	5.22934	6.3457e-05
A_01_P005317	FAM26F	family with sequence similarity 26, member F	5.22	8.56582e-05
A_01_P009766	RORA	RAR-related orphan receptor A	5.1817	0.0040085
A_01_P006790	C16orf59	chromosome 16 open reading frame 59	5.12095	0.00573138
A_01_P001114	PHLDA2	pleckstrin homology-like domain, family A, member 2	5.10888	0.00349459
A_01_P007161	LOC705927	e3 ubiquitin-protein ligase LINCR-like	5.05925	0.000843916
A_01_P015672	FGFBP2	fibroblast growth factor binding protein 2	4.97849	0.00532601
A_01_P005037	LOC706478	melanoma-associated antigen 8-like	4.97331	0.00174044
A_01_P017606	GOLSYN	Golgi-localized protein	4.94812	0.00364453
A_01_P012780	NR4A2	nuclear receptor subfamily 4, group A, member 2	4.94387	0.00181901
A_01_P003254	C1QC	complement component 1, q subcomponent, C chain	4.90658	0.00150055
A_01_P016296	CXCL10	chemokine (C-X-C motif) ligand 10	4.89462	0.00022214
A_01_P000327	RBP3	retinol binding protein 3, interstitial	4.85531	5.12756e-05
A_01_P016327	LOC719247	tektin-5-like	4.83725	0.00957617
A_01_P005341	FAM26F	family with sequence similarity 26, member F	4.8274	8.45138e-05
A_01_P008355	LOC696984	transmembrane protein 146-like	4.77572	0.000857446
A_01_P005474	ATP6V1B1	ATPase, H+ transporting, lysosomal 56/58kDa, V1 subunit B1	4.7118	0.000339773
A_01_P006926	FOS	FBJ murine osteosarcoma viral oncogene homolog	4.68633	0.00112076
A_01_P013192	ATF3	activating transcription factor 3	4.67876	0.0039197
A_01_P009415	LOC100424740	hypothetical protein LOC100424740	4.67801	0.00015014
A_01_P017063	CFB	complement factor B	4.65812	0.00576194
A_01_P014585	GEM	GTP binding protein overexpressed in skeletal muscle	4.62018	0.00110111
A_01_P011092	VILL	villin-like	4.60908	6.63295e-05
A_01_P003145	SEC14L3	SEC14-like 3 (S. cerevisiae)	4.57973	0.000163964
A_01_P013221	NAT8	probable N-acetyltransferase 8-like	4.54038	0.000584451
A_01_P015483	PDLIM7	PDZ and LIM domain 7 (enigma)	4.53691	0.00062699
A_01_P017811	CKB	creatine kinase, brain	4.5071	0.00038404
A_01_P003546	C2CD4A	C2 calcium-dependent domain containing 4A	4.50253	0.00126448
A_01_P014505	GCKR	glucokinase (hexokinase 4) regulator	4.49763	0.00270365
A_01_P014123	TXNIP	thioredoxin interacting protein	4.48205	0.000558703
A_01_P013754	KCNC2	potassium voltage-gated channel, Shaw-related subfamily, member 2	4.47481	0.000266839
A_01_P004741	CPVL	carboxypeptidase, vitellogenic-like	4.47352	0.00382741
A_01_P015641	GFPT2	glutamine-fructose-6-phosphate transaminase 2	4.46011	0.00918938
A_01_P008405	AMBP	protein AMBP-like	4.44028	0.000988258
A_01_P003601	CPVL	carboxypeptidase, vitellogenic-like	4.43373	0.00334002
A_01_P015403	LOC718911	uncharacterized protein C17orf50-like	4.42971	0.000354281
A_01_P003180	C1QA	complement component 1, q subcomponent, A chain	4.42729	0.000956736
A_01_P002099	EDN2	endothelin 2	4.41482	0.00078439
A_01_P019556	LOC712754	regulator of G-protein signaling 1-like	4.40821	0.00048713
A_01_P002830	LOC722189	retinoic acid receptor responder protein 3-like	4.39004	0.00038404
A_01_P002023	HCG9	Similar to human HLA complex group 9 HCG9	4.37171	0.00144393
A_01_P012500	SRCAP	Snf2-related CREBBP activator protein	4.36481	0.000270521
A_01_P011762	IL5RA	interleukin 5 receptor, alpha	4.35356	0.00182654
A_01_P008181	RASD1	RAS, dexamethasone-induced 1	4.33993	0.00346244
A_01_P005429	LOC714549	oxidative stress-induced growth inhibitor 1-like	4.31202	0.0034183
A_01_P010567	HOXB5	homeobox B5	4.29809	8.79551e-05
A_01_P017266	NAALADL1	N-acetylated alpha-linked acidic dipeptidase-like 1	4.26468	0.000414846
A_01_P009381	KLF10	Kruppel-like factor 10	4.25215	0.00115435
A_01_P002605	GPRC5A	G protein-coupled receptor, family C, group 5, member A	4.24632	0.000816385
A_01_P001751	EHD1	EH-domain containing 1	4.23511	0.000427931
A_01_P002994	LOC706221	bactericidal permeability-increasing protein-like	4.22666	0.000558703
A_01_P015725	SH3D19	SH3 domain containing 19	4.20625	6.3457e-05
A_01_P014870	TAAR6	trace amine associated receptor 6	4.20523	0.000720516
A_01_P015063	NOX5	NADPH oxidase, EF-hand calcium binding domain 5	4.20473	0.000685634
A_01_P006515	SDS	serine dehydratase	4.20454	0.000280481
A_01_P015518	DUSP10	dual specificity phosphatase 10	4.19602	0.000506875
A_01_P014387	SOX13	SRY (sex determining region Y)-box 13	4.18074	0.000295197
A_01_P006391	INHBA	inhibin, beta A	4.17923	0.00254392
A_01_P014640	LOC718704	FAM163A-like	4.17725	0.000308176
A_01_P009688	SEMA5A	sema domain, 7 thrombospondin repeats, TM and short cytoplasmic domain, 5A	4.17081	0.000744641
A_01_P014215	LOC717833	four-jointed box protein 1-like	4.16714	8.09697e-05
A_01_P010042	AMPD1	adenosine monophosphate deaminase 1	4.16621	0.000553111
A_01_P002038	GP9	glycoprotein IX (platelet)	4.16017	0.000164285
A_01_P016323	TNNI3	troponin I type 3 (cardiac)	4.14355	0.000680679
A_01_P006674	MFSD2A	major facilitator superfamily domain containing 2A	4.13698	0.00295331
A_01_P013445	LOC706425	isthmin-2-like	4.1311	0.000447134
A_01_P008494	MND1	meiotic nuclear divisions 1 homolog (S. cerevisiae)	4.1159	0.00265601
A_01_P006806	GADD45A	growth arrest and DNA-damage-inducible, alpha	4.1068	0.000650727
A_01_P011748	MESP1	mesoderm posterior 1 homolog (mouse)	4.09674	0.000621893
A_01_P004637	FLI1	Friend leukemia integration 1 transcription factor-like	4.09486	0.00041978
A_01_P008065	CDKN2B	cyclin-dependent kinase inhibitor 2B (p15, inhibits CDK4)	4.09323	0.00140975
A_01_P011574	CLCF1	cardiotrophin-like cytokine factor 1	4.09097	0.00247548
A_01_P004241	DNAH5	dynein, axonemal, heavy chain 5	4.08528	0.00272384
A_01_P015553	ZNF296	zinc finger protein 296	4.06047	0.00471393
A_01_P006968	ZNF16	zinc finger protein 16	4.05771	0.000153359
A_01_P011586	LOC100426988	olfactory receptor 11H6-like	4.05493	0.000163964
A_01_P019759	LOC702789	phorbol-12-myristate-13-acetate-induced protein 1-like	4.03348	0.000904393
A_01_P004353	SEMG1P	semenogelin I pseudogene	4.03341	0.00662883
A_01_P003875	GABRA2	gamma-aminobutyric acid (GABA) A receptor, alpha 2	4.02861	0.000216718
A_01_P008593	LOC714631	erythroid transcription factor-like	4.02102	0.00904586
A_01_P002866	GPX3	glutathione peroxidase 3 (plasma)	4.0011	0.0015658
A_01_P016283	DYRK3	dual-specificity tyrosine-(Y)-phosphorylation regulated kinase 3	3.98617	0.000463546
A_01_P003088	IL1F9	interleukin 36, gamma	3.98193	0.00131801
A_01_P015638	AREGB	amphiregulin B	3.95964	0.00285973
A_01_P002956	GDF5	growth differentiation factor 5	3.95883	0.000190691
A_01_P010537	MNP1A	alpha-defensin 1A	3.94949	0.000808899
A_01_P008303	TFAP2A	transcription factor AP-2 alpha	3.94706	0.000249031
A_01_P007058	FCGR1	high affinity immunoglobulin gamma Fc receptor I	3.94152	0.00614159
A_01_P017577	ITGA8	integrin, alpha 8	3.9268	0.000808241
A_01_P001060	HES4	hairy and enhancer of split 4 (Drosophila)	3.9257	0.000308942
A_01_P006159	SELP	selectin P	3.91896	0.000884281
A_01_P010915	CHRNB2	cholinergic receptor, nicotinic, beta 2 (neuronal)	3.91876	0.000245875
A_01_P012324	TNFSF14	tumor necrosis factor (ligand) superfamily, member 14	3.89015	0.000824931
A_01_P017236	LOC695164	tumor protein p73-like	3.88893	0.000218105
A_01_P015046	LOC722817	interleukin-11-like	3.88676	0.00930642
A_01_P003860	PADI6	peptidyl arginine deiminase, type VI	3.88485	0.000443161
A_01_P008848	LOC700588	tumor necrosis factor ligand superfamily member 9-like	3.88206	0.000362452
A_01_P019557	SGK1	serum/glucocorticoid regulated kinase 1	3.87631	0.00623234
A_01_P012289	PCDHB14	protocadherin beta 14	3.86775	0.000356073
A_01_P016366	TPSB2	tryptase beta 2 (gene/pseudogene)	3.86532	0.000625669
A_01_P015178	LOC719421	serum amyloid P-component-like	3.8631	0.00232133
A_01_P004547	GRK1	G protein-coupled receptor kinase 1	3.85209	0.000675663
A_01_P012372	LOC717288	early activation antigen CD69-like	3.84505	0.00142232
A_01_P010911	HPN	hepsin	3.83713	8.09697e-05
A_01_P004821	LOC712710	a disintegrin and metalloproteinase with thrombospondin motifs 18-like	3.83699	0.00113181
A_01_P006027	LOC708785	hypothetical	3.83422	0.00143093
A_01_P009275	SOX14	SRY (sex determining region Y)-box 14	3.83403	0.00125901
A_01_P009729	LOC714069	protein tweety homolog 3-like	3.83057	0.000105102
A_01_P017300	KCND3	potassium voltage-gated channel, Shal-related subfamily, member 3	3.83004	0.000336469
A_01_P017990	LOC703677	hypothetical LOC703677	3.82586	0.000356073
A_01_P019884	FIBP	fibroblast growth factor (acidic) intracellular binding protein	3.81009	0.000283032
A_01_P007387	MFSD6L	major facilitator superfamily domain containing 6-like	3.80523	0.000354281
A_01_P008333	SERINC2	serine incorporator 2	3.80493	0.00825321
A_01_P000376	ANKRD45	ankyrin repeat domain 45	3.79188	0.00138602
A_01_P018766	ADRA2C	Similar to Homo sapiens adrenergic, alpha-2C-, receptor (ADRA2C)	3.78771	0.00030268
A_01_P008126	SAMD4A	sterile alpha motif domain containing 4A	3.78319	0.00137558
A_01_P011313	HGF	hepatocyte growth factor (hepapoietin A; scatter factor)	3.78253	0.00177098
A_01_P012133	EARS2	glutamyl-tRNA synthetase 2, mitochondrial (putative)	3.76854	0.000198222
A_01_P002187	PSORS1C2	psoriasis susceptibility 1 candidate 2	3.7685	0.000416698
A_01_P009219	SERPINA7	serpin peptidase inhibitor, clade A member 7	3.76684	0.0055243
A_01_P009549	LOC695810	transmembrane protein 169-like	3.75875	0.00583557
A_01_P018176	TUBA8	tubulin, alpha 8	3.75528	0.00341939
A_01_P010287	LOC100429928	hypothetical protein LOC100429928	3.74412	8.09697e-05
A_01_P000930	ZSCAN2	zinc finger and SCAN domain containing 2	3.74041	0.00139789
A_01_P005290	KLK6	kallikrein-related peptidase 6	3.73313	8.65239e-05
A_01_P008030	ERRFI1	ERBB receptor feedback inhibitor 1	3.73285	0.00217544
A_01_P000076	HGF	hepatocyte growth factor (hepapoietin A; scatter factor)	3.73144	0.000836787
A_01_P012028	MPZL3	myelin protein zero-like 3	3.72757	0.00840187
A_01_P013153	GREB1L	growth regulation by estrogen in breast cancer-like	3.7253	8.16643e-05
A_01_P012635	LOC712617	regulator of G-protein signaling 2-like	3.72126	0.00504619
A_01_P005086	LOC723317	ig lambda chain V-III region LOI-like	3.71607	0.000829435
A_01_P019285	FGF22	fibroblast growth factor 22	3.7132	0.000159266
A_01_P001228	PTGS2	prostaglandin-endoperoxide synthase 2	3.71188	0.00472565
A_01_P003430	LOC100430777	cholecystokinin-like	3.70887	0.000163964
A_01_P005184	LOC714407	early growth response protein 4-like	3.70523	0.000690381
A_01_P003520	SIK1	serine/threonine-protein kinase SIK1-like	3.68855	0.000857446
A_01_P018613	RHBDL3	rhomboid, veinlet-like 3 (Drosophila)	3.68493	0.000176179
A_01_P014587	NR4A3	nuclear receptor subfamily 4, group A, member 3	3.67994	0.00528942
A_01_P002477	RXFP2	relaxin/insulin-like family peptide receptor 2.	3.67663	0.00258158
A_01_P000840	C3	complement component 3	3.66787	0.00296335
A_01_P017066	ENPEP	glutamyl aminopeptidase (aminopeptidase A)	3.66083	0.00103058
A_01_P012429	LOC697324	cyclin-dependent kinases regulatory subunit 2-like	3.65818	0.0031822
A_01_P006287	TM6SF2	transmembrane 6 superfamily member 2	3.65801	0.000116221
A_01_P002828	LTC4S	leukotriene C4 synthase	3.65604	0.000555258
A_01_P013076	VGLL1	vestigial like 1 (Drosophila)	3.63201	0.0046365
A_01_P000211	LOC721131	myeloblastin-like	3.63002	0.000881606
A_01_P012792	LOC710825	melanoma-associated antigen 4-like	3.61992	0.00102978
A_01_P012464	HGF	hepatocyte growth factor	3.61695	0.00606498
A_01_P002504	CST3	cystatin C	3.60727	0.00259395
A_01_P009081	LOC696008	e3 ubiquitin-protein ligase HACE1-like	3.60468	0.00437131
A_01_P009151	GBP1	guanylate binding protein 1, interferon-inducible	3.59237	0.000190691
A_01_P018818	UCN3	urocortin 3 (stresscopin)	3.59109	0.00668872
A_01_P019576	EID3	EP300 interacting inhibitor of differentiation 3	3.58403	0.000132399
A_01_P019207	KLHL34	kelch-like 34 (Drosophila)	3.58296	0.00171056
A_01_P000690	STK32B	serine/threonine kinase 32B	3.57186	0.00118504
A_01_P017339	F3	coagulation factor III	3.56764	0.00388206
A_01_P010032	LOC708409	calretinin-like	3.56725	0.000562986
A_01_P008660	LOC694433	DEP domain-containing protein 7-like	3.5644	0.00186746
A_01_P013673	COX6A2	cytochrome c oxidase subunit VIa polypeptide 2	3.56343	0.000583859
A_01_P015899	TAF1	transcription initiation factor TFIID subunit 1-like	3.55298	0.000853569
A_01_P007578	ANGPT1	angiopoietin 1	3.55162	0.00016855
A_01_P017317	SPHK1	sphingosine kinase 1	3.55001	0.00178958
A_01_P011220	LOC717331	hypothetical LOC717331	3.54451	0.00101183
A_01_P009409	MNP1A	alpha-defensin 1A	3.5415	0.000685634
A_01_P015068	CRLF2	cytokine receptor-like factor 2	3.53058	0.00124815
A_01_P018040	GADD45G	growth arrest and DNA-damage-inducible, gamma	3.53056	0.00131724
A_01_P001742	EGR3	early growth response 3	3.52092	0.00176352
A_01_P005533	LOC693492	u7 snRNA-associated Sm-like protein LSm11-like	3.51989	0.00428106
A_01_P003562	SPRY4	sprouty homolog 4 (Drosophila)	3.51557	0.00096715
A_01_P014296	KLHL31	kelch-like 31 (Drosophila)	3.50497	0.000127686
A_01_P014195	IL23A	interleukin 23, alpha subunit p19	3.50157	0.0015658
A_01_P012309	TLCD2	TLC domain containing 2	3.49189	0.000356718
A_01_P005863	AGXT2	alanine--glyoxylate aminotransferase 2	3.49012	0.000681178
A_01_P009399	LOC717945	glutamate [NMDA] receptor subunit epsilon-4-like	3.48825	0.00103573
A_01_P018810	11-BETA-HSD2	11-beta-hydroxysteroid dehydrogenase type 2	3.48805	0.000714624
A_01_P017561	IL22	interleukin 22	3.48031	0.0015152
A_01_P017476	CPEB2	cytoplasmic polyadenylation element binding protein 2	3.47021	6.3457e-05
A_01_P012422	LOC716655	acid sphingomyelinase-like phosphodiesterase 3b-like	3.46864	0.00131549
A_01_P009089	FN3KRP	fructosamine 3 kinase related protein	3.46682	0.00441288
A_01_P017104	TGFB1I1	transforming growth factor beta 1 induced transcript 1	3.46655	0.000646071
A_01_P012174	LOC701314	protein maestro-like	3.45471	0.0055306
A_01_P005645	LTC4S	leukotriene C4 synthase	3.4523	0.000367771
A_01_P004948	FGF4	fibroblast growth factor 4	3.45009	8.09697e-05
A_01_P015593	ITIH1	inter-alpha (globulin) inhibitor H1	3.44444	0.00016855
A_01_P007138	LOC693771	transmembrane protein 51-like	3.44224	0.00048713
A_01_P000137	G6PC	glucose-6-phosphatase,	3.44095	0.000683544
A_01_P007140	LOC710167	olfactory receptor 4X2-like	3.43867	0.00398433
A_01_P008850	MPP2	membrane protein, palmitoylated 2	3.43374	0.00142141
A_01_P002558	EPB41L4B	erythrocyte membrane protein band 4.1 like 4B	3.42939	0.000969442
A_01_P017835	LOC713638	protein S100-A16-like	3.42047	0.00120418
A_01_P008799	EREG	epiregulin	3.4189	0.00856902
A_01_P018944	ZNF703	zinc finger protein 703	3.41601	0.00339082
A_01_P011492	LOC714453	dehydrogenase/reductase SDR family member 2-like	3.41431	0.000188135
A_01_P013109	NTN3	netrin 3	3.41102	8.45138e-05
A_01_P000688	GRASP	GRP1-associated scaffold protein	3.40918	0.000194341
A_01_P014502	LOC714807	IQ domain-containing protein G-like	3.40676	0.000598037
A_01_P005060	LOC100427743	PRAME family member 1-like	3.39922	0.000391812
A_01_P019475	TM6SF2	transmembrane 6 superfamily member 2	3.39907	0.000243526
A_01_P008966	ASB11	ankyrin repeat and SOCS box containing 11	3.39722	0.00419682
A_01_P013680	LOC703972	amiloride-sensitive cation channel 4-like	3.38126	6.63295e-05
A_01_P010693	RNF111	hypothetical LOC702104	3.37648	0.000314658
A_01_P010580	C11orf42	chromosome 11 open reading frame 42	3.37294	0.000435976
A_01_P000817	LOC694125	semaphorin-6B-like	3.37225	0.00103123
A_01_P010630	NPTX2	neuronal pentraxin II	3.37132	0.000416628
A_01_P005318	BAI1	brain-specific angiogenesis inhibitor 1-like	3.36916	0.000248313
A_01_P000989	FNDC4	fibronectin type III domain containing 4	3.35633	0.00211271
A_01_P018729	CDH9	cadherin 9, type 2 (T1-cadherin)	3.35606	6.63295e-05
A_01_P011286	ACTL7A	actin-like 7A	3.35509	0.000381332
A_01_P014580	C20orf54	chromosome 20 open reading frame 54	3.35083	7.6733e-05
A_01_P008004	FOLR1	folate receptor 1 (adult)	3.34575	0.000356933
A_01_P002142	LOC705506	olfactory receptor 6C6-like	3.34394	0.00284374
A_01_P016633	CSF2	colony stimulating factor 2	3.34249	0.00376377
A_01_P006718	LOC711078	gap junction beta-5 protein-like	3.33835	0.0026027
A_01_P000571	OR1K1	olfactory receptor, family 1, subfamily K, member 1	3.33647	0.00260852
A_01_P016735	SLC1A3	solute carrier family 1 , member 3	3.33503	0.00488514
A_01_P004051	CCRN4L	CCR4 carbon catabolite repression 4-like (S. cerevisiae)	3.33348	0.00447761
A_01_P017946	LOC706837	neuronatin-like	3.33346	0.000416628
A_01_P006974	IGSF9	immunoglobulin superfamily, member 9	3.329	0.000248313
A_01_P010408	HTRA3	HtrA serine peptidase 3	3.32621	0.0018341
A_01_P010074	PTH2	parathyroid hormone 2	3.32096	0.00022214
A_01_P004089	LOC711946	MTSS1-like protein-like	3.31874	0.000675663
A_01_P014037	GADD45B	growth arrest and DNA-damage-inducible, beta	3.30775	0.000362452
A_01_P015323	DNMT3L	DNA (cytosine-5-)-methyltransferase 3-like	3.3068	0.00629009
A_01_P014144	LOC716755	transient receptor potential cation channel subfamily M 7-like	3.30583	0.000311114
A_01_P002847	LOC714089	beta-defensin 126-like	3.30491	7.78317e-05
A_01_P015637	WDR93	WD repeat domain 93 (WDR93)	3.30215	0.00087419
A_01_P017412	BPIFB2	BPI fold containing family B, member 2	3.30147	0.000999567
A_01_P001664	LOC100428375	hypothetical protein LOC100428375	3.30113	0.000311114
A_01_P010555	EPHA2	EPH receptor A2	3.29618	0.00259884
A_01_P010178	LOC719036	pleckstrin homology-like domain family A member 1-like	3.29	0.00688343
A_01_P004883	TMEM88	TMEM88 transmembrane protein 88	3.28911	0.00386137
A_01_P016505	NFIC	nuclear factor I/C (CCAAT-binding transcription factor)	3.28414	0.00172856
A_01_P010388	LOC719660	c3 and PZP-like alpha-2-macroglobulin domain-containing protein 8-like	3.27329	0.0026027
A_01_P005105	ERBB3	v-erb-b2 erythroblastic leukemia viral oncogene homolog 3 (avian)	3.27232	0.000163964
A_01_P013774	LOC100427272	hypothetical protein LOC100427272	3.26825	0.000356718
A_01_P017812	LOC710543	heat shock-related 70 kDa protein 2-like	3.26584	0.00374131
A_01_P015284	LOC715304	lymphocyte antigen 6 complex locus protein G6f-like	3.26576	0.000562349
A_01_P010485	SEPT5	septin 5	3.25772	0.00753384
A_01_P014171	ATP6V0D2	ATPase, H+ transporting, lysosomal 38kDa, V0 subunit d2	3.25599	0.00096715
A_01_P008276	OASL	2'-5'-oligoadenylate synthetase-like	3.24664	0.0018588
A_01_P008524	LOC700649	calcitonin-like	3.24246	0.000491732
A_01_P011141	GPR173	G protein-coupled receptor 173	3.23896	0.000204432
A_01_P003905	ABHD5	abhydrolase domain containing 5	3.23705	0.00195867
A_01_P007523	LOC707814	olfactory receptor 5W2-like	3.23087	0.00285489
A_01_P009279	EGFR	epidermal growth factor receptor	3.22838	0.00126601
A_01_P008122	ESRRB	steroid hormone receptor hERR2	3.22377	0.00156706
A_01_P001835	GDF2	growth differentiation factor 2	3.2149	0.00012377
A_01_P009074	CDY2B	chromodomain protein, Y-linked, 2B	3.21269	0.00272732
A_01_P008074	SERPINB7	serpin peptidase inhibitor, clade B (ovalbumin), member 7	3.21199	0.00279455
A_01_P014453	HCN3	hyperpolarization activated cyclic nucleotide-gated potassium channel 3	3.21139	0.00030268
A_01_P001669	RNASEK	ribonuclease, RNase K	3.21058	0.00038404
A_01_P003820	C21orf62	chromosome 21 open reading frame 62	3.20568	0.00027543
A_01_P005400	SIGLEC15	sialic acid binding Ig-like lectin 15	3.20429	0.000278682
A_01_P020052	PNCK	pregnancy up-regulated non-ubiquitously expressed CaM kinase	3.19848	0.000244786
A_01_P005244	LOC695214	histone H4-like	3.19732	0.00772579
A_01_P002300	LOC710161	rho-related GTP-binding protein Rho6-like	3.18967	0.0019808
A_01_P020109	DNMT3L	DNA (cytosine-5-)-methyltransferase 3-like	3.18829	0.00922349
A_01_P002049	DGKB	diacylglycerol kinase, beta 90kDa	3.18665	0.00346914
A_01_P005729	LOC721685	Wnt-5b-like	3.17659	0.00197432
A_01_P015345	NKAPL	NFKB activating protein-like	3.16717	0.000478255
A_01_P005142	B3GNT5	UDP-GlcNAc:betaGal beta-1,3-N-acetylglucosaminyltransferase 5	3.16152	0.00562702
A_01_P000068	OR10A6	olfactory receptor, family 10, subfamily A, member 6	3.14951	0.000625813
A_01_P017124	LOC710372	v-type proton ATPase subunit G 3-like	3.14804	0.000344708
A_01_P015344	LOC708724	olfactory receptor 8H3-like	3.14775	0.00663167
A_01_P019374	PTTG1	pituitary tumor-transforming 1	3.14343	0.00262999
A_01_P004114	GAST	gastrin	3.14181	0.000631447
A_01_P004084	LOC718761	spermine oxidase-like	3.14079	0.000694694
A_01_P015800	NR4A3	nuclear receptor subfamily 4, group A, member 3	3.14045	0.000443161
A_01_P001685	LOC721138	transmembrane protease serine 9-like	3.13896	0.00012377
A_01_P001492	HGF	hepatocyte growth factor	3.13511	0.00689376
A_01_P010066	POU2F3	POU class 2 homeobox 3	3.13376	0.00122428
A_01_P010143	EPS8L3	EPS8-like 3	3.13123	0.00173337
A_01_P008014	LOC712761	apolipoprotein F-like	3.13024	0.000954613
A_01_P010281	PTPRN	protein tyrosine phosphatase, receptor type, N	3.12862	0.000364087
A_01_P003977	LOC100427850	integrin alpha-X-like	3.1195	0.00449031
A_01_P013130	MYLIP	myosin regulatory light chain interacting protein	3.11921	0.00790407
A_01_P016754	DCST1	DC-STAMP domain containing 1	3.11498	0.00241976
A_01_P012981	KLK15	kallikrein-related peptidase 15	3.11319	0.000132399
A_01_P007962	LOC710469	WAP four-disulfide core domain protein 2-like	3.1095	0.000297774
A_01_P014842	NXF3	nuclear RNA export factor 3	3.10927	0.00116028
A_01_P019117	HTR1D	5-hydroxytryptamine (serotonin) receptor 1D	3.1081	0.0009896
A_01_P013177	C1S	complement component 1, s subcomponent	3.10762	0.00726764
A_01_P001629	RAPGEF4	Rap guanine nucleotide exchange factor (GEF) 4	3.10708	0.00182437
A_01_P006456	IGSF22	immunoglobulin superfamily, member 22	3.10613	0.00185599
A_01_P004140	TSGA10IP	testis specific, 10 interacting protein	3.10108	0.00120353
A_01_P013127	HSD17B14	hydroxysteroid (17-beta) dehydrogenase 14	3.09935	0.000761059
A_01_P005073	LOC710796	frizzled-5-like	3.09817	0.00476767
A_01_P019384	LOC100428624	hypothetical protein	3.09594	0.000267869
A_01_P016638	LOC100423163	hypothetical protein	3.09534	0.00595016
A_01_P019934	COL5A3	collagen alpha-3(V) chain-like	3.09442	0.00172093
A_01_P017891	LOC721481	putative uncharacterized protein C19orf35-like	3.08101	0.000685058
A_01_P014877	LOC719036	pleckstrin homology-like domain family A member 1-like	3.08088	0.00362122
A_01_P001476	DEFB118	defensin, beta 118	3.08071	0.0015658
A_01_P003753	RNF123	acylamino-acid-releasing enzyme (ring finger protein 123)	3.07828	7.78317e-05
A_01_P011996	HUS1	HUS1 checkpoint homolog (S. pombe)	3.07782	0.000583859
A_01_P006832	LOC718985	pleckstrin homology domain-containing family B member 2-like	3.07508	0.00135747
A_01_P017392	SLC2A1	solute carrier family 2 (facilitated glucose transporter), member 1	3.06666	0.00174044
A_01_P012323	LOC100426994	hypothetical protein	3.06646	0.000554738
A_01_P001403	LOC713600	hypothetical	3.06081	0.00115501
A_01_P019666	IGF2	insulin-like growth factor 2 (somatomedin A) (IGF2)	3.05775	0.00327358
A_01_P012607	LOC715961	uncharacterized protein KIAA1529-like	3.05411	0.000632071
A_01_P019752	LOC703670	dynein heavy chain 12, axonemal-like	3.05154	0.001753
A_01_P000341	PAX8	paired box 8	3.044	0.00197521
A_01_P004643	DVL2	dishevelled, dsh homolog 2 (Drosophila)	3.03484	0.000210899
A_01_P017711	GUCA1C	guanylyl cyclase-activating protein 1-like	3.03318	0.000153359
A_01_P007248	SERTAD1	SERTA domain containing 1	3.03056	0.00433061
A_01_P016833	TFAP2D	transcription factor AP-2 delta	3.02902	0.00089681
A_01_P006230	OMP	olfactory marker protein	3.0258	0.000283032
A_01_P016703	RHOB	ras homolog gene family, member B	3.02545	0.00236355
A_01_P006749	STON2	stonin 2	3.02092	0.00292263
A_01_P010278	CAPS2	calcyphosin-2-like	3.01992	0.00998245
A_01_P000026	HBG	hemoglobin, gamma G	3.01935	0.000577298
A_01_P006477	CHST13	carbohydrate (chondroitin 4) sulfotransferase 13	3.01911	0.000891951
A_01_P015728	TICAM2	toll-like receptor adaptor molecule 2	3.01424	0.00188133
A_01_P009599	LOC715740	barttin-like	3.00926	0.00163665
A_01_P014082	SLC6A2	solute carrier family 6, member 2	3.00892	8.09697e-05
A_01_P007907	CYP2C75	cytochrome P450, family 2, subfamily C, polypeptide 75	3.00481	0.00114154
A_01_P006059	SLC30A8	solute carrier family 30 (zinc transporter), member 8	3.00276	0.00409328
A_01_P012528	LOC100425114	potassium/sodium hyperpolarization-activated cyclic nucleotide-gated channel 2-like	3.0012	0.00159964
A_01_P014455	MRGPRX1	MAS-related GPR, member X1	3.00114	0.00155347
A_01_P019015	LOC710142	zinc transporter ZIP8-like	3.00074	0.00189539
A_01_P000950	SP6	Sp6 transcription factor	3.00062	0.00290582
A_01_P010361	LOC707174	olfactory receptor 2T8-like	3.00007	0.00091871
A_01_P007634	VWCE	von Willebrand factor C and EGF domains	2.99709	0.00096715
A_01_P001072	SALL3	sal-like 3 (Drosophila)	2.99435	0.000194341
A_01_P012904	C12orf61	chromosome 12 open reading frame 61	2.98963	0.00763131
A_01_P008186	CDHR1	cadherin-related family member 1	2.98728	0.00105996
A_01_P001748	KCNJ11	potassium inwardly-rectifying channel, subfamily J, member 11	2.98106	0.00457603
A_01_P009118	LAMC2	laminin, gamma 2	2.97858	0.00410055
A_01_P000960	LOC710469	WAP four-disulfide core domain protein 2-like	2.97787	0.00012377
A_01_P012583	CST6	cystatin E/M	2.97616	0.00313315
A_01_P014117	ICAM1	intercellular adhesion molecule 1	2.96904	0.000460467
A_01_P014192	GBP6	guanylate binding protein family, member 6	2.96662	0.000105102
A_01_P008856	LOC705756	FAM3D-like	2.9665	0.000494376
A_01_P016812	OR2J3	olfactory receptor, family 2, subfamily J, member 3	2.96618	0.00122681
A_01_P011372	STAC	SH3 and cysteine rich domain	2.96299	0.00311074
A_01_P005945	EIF2C3	eukaryotic translation initiation factor 2C, 3	2.96248	0.000300757
A_01_P015931	LOC705446	protein FAM166A-like	2.96172	0.00315981
A_01_P011753	C10orf107	chromosome 10 open reading frame 107	2.95572	0.00468954
A_01_P009733	CD274	CD274 molecule	2.95095	0.00644879
A_01_P011523	PQBP1	polyglutamine binding protein 1	2.95046	0.00567995
A_01_P017060	ADC	arginine decarboxylase	2.9503	0.000243386
A_01_P004708	LOC693954	dmX-like protein 2-like	2.94838	0.000416628
A_01_P005974	TAS1R1	taste receptor, type 1, member 1	2.94786	0.000327472
A_01_P014943	HOXC10	homeobox C10	2.94425	0.000204432
A_01_P019911	PSD	pleckstrin and Sec7 domain containing PSD	2.94352	0.000271456
A_01_P013307	LOC100430078	megakaryocyte-associated tyrosine-protein kinase-like	2.94305	0.00141219
A_01_P004112	C20orf46	chromosome 20 open reading frame 46	2.94207	0.0012355
A_01_P019635	IHH	Indian hedgehog	2.93878	0.000650727
A_01_P006449	SLC28A3	solute carrier family 28, member 3	2.93555	0.000447134
A_01_P003384	AMOT	angiomotin	2.93232	0.00491383
A_01_P002059	SPTBN2	spectrin, beta, non-erythrocytic 2	2.93098	0.000355652
A_01_P015937	NR4A1	nuclear receptor subfamily 4, group A, member 1	2.9267	0.000516008
A_01_P016756	REG1B	regenerating islet-derived 1 beta	2.92456	0.00329721
A_01_P017460	LOC100427316	putative uncharacterized protein encoded by NCRNA00114-like	2.92387	0.00451183
A_01_P008278	FOXB1	forkhead box protein B1-like	2.9221	0.00188445
A_01_P007813	FGF21	fibroblast growth factor 21	2.92112	0.00054181
A_01_P011482	BCKDK	branched chain ketoacid dehydrogenase kinase	2.92093	0.00161497
A_01_P015938	BARHL2	BarH-like homeobox 2	2.9176	0.00214972
A_01_P005825	SLC1A7	solute carrier family 1 (glutamate transporter), member 7	2.91686	0.000992412
A_01_P011600	CLIC2	chloride intracellular channel 2	2.91533	0.00766212
A_01_P000992	CYP21A2	cytochrome P450, family 21, subfamily A, polypeptide 2	2.91242	0.00260852
A_01_P006924	ADAMTS17	ADAM metallopeptidase with thrombospondin type 1 motif, 17	2.91031	0.00819452
A_01_P012080	XKR4	XK, Kell blood group complex subunit-related family, member 4	2.90735	0.00146508
A_01_P016000	CPA5	carboxypeptidase A5	2.90598	0.000356073
A_01_P009305	LOC714101	LIM/homeobox protein Lhx1-like	2.90064	0.00300533
A_01_P001177	LOC710284	hypothetical	2.89698	0.000734177
A_01_P011425	IL18	interleukin 18	2.89651	0.00840187
A_01_P012341	LOC710811	probable palmitoyltransferase ZDHHC19-like	2.89326	0.000617196
A_01_P006766	RAB32	RAB32, member RAS oncogene family	2.89251	0.00548803
A_01_P005881	CST3	cystatin C	2.89207	0.00624084
A_01_P013123	LOC711743	lipopolysaccharide-induced tumor necrosis factor-alpha factor-like	2.89189	0.00210325
A_01_P003187	RRAD	Ras-related associated with diabetes	2.89165	0.00962934
A_01_P014675	SDC3	syndecan 3	2.88964	0.001657
A_01_P001891	LOC710662	urokinase plasminogen activator surface receptor-like	2.88579	0.00695172
A_01_P000200	GFER	growth factor, augmenter of liver regeneration	2.87762	0.00104987
A_01_P014720	MTG1	mitochondrial GTPase 1 homolog (S. cerevisiae)	2.8775	0.00292803
A_01_P010358	MARCO	macrophage receptor with collagenous structure	2.87492	0.00553363
A_01_P019397	CCDC108	coiled-coil domain containing 108	2.87487	0.000198222
A_01_P018651	LOC697859	glycoprotein hormones alpha chain-like	2.87437	0.000675663
A_01_P012689	LOC718709	dermokine-like	2.87195	0.0005344
A_01_P012290	LOC699032	receptor-type tyrosine-protein phosphatase H-like	2.86935	0.0030018
A_01_P016409	ACR	acrosin	2.86916	0.00148061
A_01_P011809	ARX	aristaless related homeobox	2.86711	0.000996476
A_01_P007908	LOC717810	tyrosine-protein kinase Lck-like	2.86604	0.000290037
A_01_P007731	UBXN10	UBX domain protein 10	2.85726	0.00799262
A_01_P010474	XAGE1D	Similar to human XAGE1D X antigen family, member 1D	2.85638	0.000281876
A_01_P014511	LOC718857	uteroglobin-like	2.85221	0.00323945
A_01_P011873	IL17A	interleukin 17A	2.8522	0.00665331
A_01_P010259	LOC700183	zinc finger protein 64 homolog, isoforms 3 and 4-like	2.85115	0.00211133
A_01_P003914	NKX3-2	NK3 homeobox 2	2.85083	0.00450192
A_01_P002756	LOC700579	interleukin-1 family member 7-like	2.84941	0.00182893
A_01_P019158	RASL11A	RAS-like, family 11, member A	2.84604	0.00461754
A_01_P015051	FERD3L	Fer3-like (Drosophila)	2.84351	9.39361e-05
A_01_P016909	LOC707174	olfactory receptor 2T8-like	2.84177	0.00131724
A_01_P006210	DDR2	discoidin domain receptor tyrosine kinase 2	2.84149	0.000159266
A_01_P015423	LOC715527	uncharacterized protein C20orf112 homolog	2.84001	7.6733e-05
A_01_P008704	LOC705659	protein FAM43B-like	2.84	0.00833716
A_01_P017088	SARDH	sarcosine dehydrogenase	2.83982	0.0016774
A_01_P011947	FOXMi	forkhead box M1	2.83892	0.000675663
A_01_P000679	RDH16	retinol dehydrogenase 16 (all-trans)	2.83469	0.000198222
A_01_P013917	NTSR1	neurotensin receptor 1 (high affinity)	2.83371	0.00240475
A_01_P000892	CDH23	cadherin-related 23	2.83168	0.00299505
A_01_P000719	LOC696305	phosphatidylinositol N-acetylglucosaminyltransferase subunit P-like	2.83117	0.000902098
A_01_P019172	NRIP3	nuclear receptor interacting protein 3	2.8306	0.00127358
A_01_P002949	LOC705472	uncharacterized protein C11orf46-like	2.82917	0.000589101
A_01_P012373	RAB20	RAB20, member RAS oncogene family	2.82887	0.00399113
A_01_P009057	UBE2S	ubiquitin-conjugating enzyme E2S	2.82671	0.000500199
A_01_P017340	TULP1	tubby like protein 1 (TULP1)	2.82348	0.000163964
A_01_P011375	LOC721125	lipid phosphate phosphatase-related protein type 3-like	2.81618	0.000536971
A_01_P002358	P2RX6	purinergic receptor P2X, ligand-gated ion channel, 6	2.8136	0.00271607
A_01_P000032	LOC722102	keratin-associated protein 12-1-like	2.81311	0.00204772
A_01_P011551	NCCRP1	non-specific cytotoxic cell receptor protein 1 homolog (zebrafish)	2.81268	0.00108162
A_01_P013697	KCNK4	potassium channel, subfamily K, member 4	2.81141	0.00146169
A_01_P011255	MMP2	matrix metallopeptidase 2	2.81005	0.000649278
A_01_P005281	PSPN	persephin	2.80271	0.000142733
A_01_P014692	PLK3	polo-like kinase 3	2.79893	0.000115694
A_01_P000512	SMCR8	Smith-Magenis syndrome chromosome region, candidate 8	2.79873	0.000517386
A_01_P008890	P2RY11	purinergic receptor P2Y, G-protein coupled, 11	2.7987	0.000163964
A_01_P002524	FOLR1	folate receptor 1 (adult)	2.796	0.000600774
A_01_P001153	LOC709542	WAP four-disulfide core domain protein 3-like	2.79575	0.000283032
A_01_P015361	CHAT	choline O-acetyltransferase	2.79469	8.09697e-05
A_01_P000663	DKKL1	dickkopf-like 1	2.79467	0.00352938
A_01_P013888	LOC717076	DAN domain family member 5-like	2.79406	0.000947366
A_01_P019802	CPLX1	complexin 1	2.78977	0.000873881
A_01_P012392	BCL2A1	BCL2-related protein A1	2.78701	0.00307502
A_01_P019727	GALP	galanin-like peptide	2.78639	0.00198115
A_01_P003581	SLC6A13	solute carrier family 6 (neurotransmitter transporter, GABA), member 13	2.7862	0.0013507
A_01_P003946	MAB21L2	mab-21-like 2 (C. elegans)	2.7844	0.000218105
A_01_P006252	APOA2	apolipoprotein A-II	2.7843	8.09697e-05
A_01_P012647	TPPP2	tubulin polymerization-promoting protein family member 2	2.78359	0.00066989
A_01_P002380	NUF2	NUF2, NDC80 kinetochore complex component, homolog (S. cerevisiae)	2.78137	0.00168056
A_01_P006555	PRICKLE2	prickle homolog 2 (Drosophila)	2.78004	0.00394481
A_01_P001367	MKNK2	MAP kinase interacting serine/threonine kinase 2	2.77575	0.000308176
A_01_P014287	CST2	cystatin SA	2.77575	0.00031528
A_01_P012470	ALPI	alkaline phosphatase, intestinal (ALPI)	2.77534	0.000536096
A_01_P018628	LOC100430175	hypothetical protein LOC100430175	2.77157	0.00811545
A_01_P009540	LOC716333	ribonuclease 8-like	2.77036	0.00013244
A_01_P013846	LPAR3	lysophosphatidic acid receptor 3	2.76921	0.00386137
A_01_P016519	LOC719368	transmembrane protein 217-like	2.76777	0.00210269
A_01_P018227	ZNF503	zinc finger protein 503	2.76773	0.00393924
A_01_P002688	LOC100427743	PRAME family member 1-like	2.76617	0.000589249
A_01_P011740	INS	insulin (INS)	2.76456	0.00155454
A_01_P018605	LOC707279	integrin alpha-7-like	2.76436	7.6733e-05
A_01_P003000	LHFPL3	lipoma HMGIC fusion partner-like 3	2.76375	0.00169121
A_01_P018160	HBEGF	heparin-binding EGF-like growth factor	2.7635	0.00187401
A_01_P001535	XAGE5	X antigen family, member 5	2.76053	0.000578952
A_01_P001327	SHH	sonic hedgehog	2.75967	0.00041978
A_01_P008676	LOC708454	zinc finger protein GLIS2-like	2.75966	0.000254361
A_01_P001999	HIST1H2AJ	histone cluster 1, H2aj	2.75881	0.00193094
A_01_P000707	SOD3	superoxide dismutase 3, extracellular	2.75818	0.000650727
A_01_P018041	GPR101	G protein-coupled receptor 101	2.75604	0.000562349
A_01_P016302	NET1	neuroepithelial cell-transforming gene 1 protein-like	2.75571	0.00182437
A_01_P001352	OR52M1	olfactory receptor, family 52, subfamily M, member 1	2.75526	0.00871131
A_01_P014767	LOC718963	c-type lectin and transmembrane domain-containing protein FLJ45910-like	2.74981	0.000198222
A_01_P004827	LOC100428619	MARCKS-related protein-like	2.74731	8.09697e-05
A_01_P001773	GGT1	gamma-glutamyltransferase 1	2.7468	0.000181943
A_01_P005009	LOC697150	multiple epidermal growth factor-like domains protein 6-like	2.74555	0.000510442
A_01_P016776	GNRH2	gonadotropin-releasing hormone 2	2.74117	0.000657859
A_01_P002029	ADM2	adrenomedullin 2	2.74061	0.00590024
A_01_P002872	XIRP1	xin actin-binding repeat containing 1	2.73545	0.00044259
A_01_P003070	LOC711291	CD177 antigen-like	2.73131	0.00123767
A_01_P014808	CDHR1	cadherin-related family member 1	2.73127	0.000603333
A_01_P013301	BGN	biglycan	2.72955	0.000181652
A_01_P005295	FLOT1	flotillin 1 (MHC class I region)	2.72937	0.00016361
A_01_P012946	LOC716224	zinc finger protein GLIS1-like	2.72885	0.00486043
A_01_P013169	PCYT2	phosphate cytidylyltransferase 2, ethanolamine	2.72754	8.09697e-05
A_01_P013401	BMP1	bone morphogenetic protein 1	2.72707	0.00771823
A_01_P014840	LOC703116	tubulin polyglutamylase TTLL5-like	2.72705	0.000234059
A_01_P006597	CRHR2	corticotropin releasing hormone receptor 2	2.72663	0.00148672
A_01_P002601	HSPB6	heat shock protein, alpha-crystallin-related, B6	2.72661	0.000481697
A_01_P005388	GRID2	glutamate receptor, ionotropic, delta 2	2.72198	0.000568199
A_01_P018389	RIT1	Ras-like without CAAX 1	2.72186	0.00138602
A_01_P006410	ZMYM5	zinc finger, MYM-type 5	2.7216	0.00422112
A_01_P014819	HOXA6	homeobox A6	2.7198	0.00115902
A_01_P007666	FAM187B	family with sequence similarity 187, member B	2.71706	0.000862461
A_01_P018769	CDHR2	cadherin-related family member 2	2.71697	0.000645233
A_01_P010053	PGA4	pepsinogen 4, group I (pepsinogen A)	2.71488	0.00163665
A_01_P019176	TMEM191C	transmembrane protein 191C	2.71455	0.00190138
A_01_P015721	TIMP1	TIMP metallopeptidase inhibitor 1	2.71266	0.000994061
A_01_P011365	LOC709366	collagen alpha-1(XXII) chain-like	2.71195	0.00277159
A_01_P002742	EVX1	even-skipped homeobox 1	2.71193	0.0032358
A_01_P008070	KRT84	keratin 84	2.70539	0.00526899
A_01_P010427	TANK	TRAF family member-associated NFKB activator	2.70035	0.00107253
A_01_P013952	LOC719866	hypothetical LOC719866	2.70011	0.000355812
A_01_P012048	SLCO4A1	solute carrier organic anion transporter family, member 4A1	2.69901	0.000700179
A_01_P019204	LOC696463	histone H2A type 2-A-like	2.6962	0.00322859
A_01_P016243	AIRE	autoimmune regulator	2.69355	0.00163665
A_01_P011020	LOC700355	uncharacterized protein C16orf7	2.69128	0.000583629
A_01_P014629	LOC715072	gametogenetin-like	2.68958	0.000296677
A_01_P008381	ACTL6B	actin-like 6B	2.68625	0.00257587
A_01_P000255	TNF	tumor necrosis factor	2.68567	0.00120353
A_01_P004078	KIAA1409	KIAA1409	2.68384	0.000354281
A_01_P006125	LOC100425096	keratin, type II cytoskeletal 3-like	2.68345	7.95972e-05
A_01_P005867	SNX10	sorting nexin 10	2.68195	0.00367183
A_01_P012539	FOXS1	forkhead box S1	2.68187	0.00395089
A_01_P016425	SCAND1	SCAN domain containing 1	2.68049	0.000354281
A_01_P008188	LOXL3	lysyl oxidase-like 3	2.68003	0.00318759
A_01_P008893	LOC696485	olfactory receptor 5C1-like	2.68001	0.00209947
A_01_P009949	ADRA1B	adrenergic, alpha-1B-, receptor	2.67864	0.00159962
A_01_P005587	MOS	v-mos Moloney murine sarcoma viral oncogene homolog	2.67615	0.00122681
A_01_P000709	LOC714993	putative C->U-editing enzyme APOBEC-4-like	2.67579	0.00444514
A_01_P004128	LOC721357	rho GTPase-activating protein 8-like	2.67535	0.000164285
A_01_P012609	NDST1	N-deacetylase/N-sulfotransferase (heparan glucosaminyl) 1	2.67524	0.0029825
A_01_P000016	CYP11B2	cytochrome P450, family 11, subfamily B, polypeptide 2	2.67497	0.0051359
A_01_P007186	RHOU	ras homolog gene family, member U	2.67463	0.00980985
A_01_P016028	LOC697051	putative N-acetylglucosamine-6-phosphate deacetylase-like	2.67382	0.000900358
A_01_P004212	MGAT5	mannosyl (alpha-1,6-)-glycoprotein beta-1,6-N-acetyl-glucosaminyltransferase	2.67014	0.0015658
A_01_P007544	LOC710018	complement C1q-like protein 4-like	2.6692	0.000929254
A_01_P004146	CSF1	colony stimulating factor 1 (macrophage)	2.66772	0.00179753
A_01_P001300	TEKT4	tektin 4	2.66743	0.00262676
A_01_P005790	NRG1	neuregulin 1	2.66447	0.000885577
A_01_P007308	GJB4	gap junction protein, beta 4, 30.3kDa	2.66431	0.000596012
A_01_P010811	GJB1	gap junction protein, beta 1, 32kDa	2.66142	0.00126838
A_01_P000912	DPF1	Similar to Homo sapiens D4, zinc and double PHD fingers family 1 (DPF1)	2.66071	0.000120131
A_01_P010512	MLEC	malectin	2.65905	0.00134246
A_01_P001653	IL1R2	BLAST-Features in this part of subject sequence: interleukin 1 receptor, type II	2.65853	0.00651823
A_01_P017798	SOX11	SRY (sex determining region Y)-box 11	2.65586	0.000322692
A_01_P009617	MUC2	mucin 2, oligomeric mucus/gel-forming	2.65538	0.000115694
A_01_P010458	ATP1B1	ATPase, Na+/K+ transporting, beta 1 polypeptide	2.65479	0.00530092
A_01_P018107	CORO2B	coronin, actin binding protein, 2B	2.65274	0.00188083
A_01_P009490	LY6D	lymphocyte antigen 6 complex, locus D	2.65263	0.00790567
A_01_P009485	NOXO1	NADPH oxidase organizer 1	2.64959	0.000521359
A_01_P010373	NID1	nidogen 1	2.6491	0.000348574
A_01_P002897	HAVCR1	hepatitis A virus cellular receptor 1	2.64557	0.00597396
A_01_P003313	PRKG2	Protein kinase, cGMP-dependent, type II	2.64229	0.00131724
A_01_P003358	SERPINA4	serpin peptidase inhibitor, clade A (alpha-1 antiproteinase, antitrypsin), member 4	2.63851	0.000521359
A_01_P016478	LOC697801	uncharacterized protein C10orf58-like	2.63788	0.00164825
A_01_P006620	LOC715456	leukemia inhibitory factor-like	2.63759	0.000685634
A_01_P001836	LOC709916	PDZK1-interacting protein 1-like	2.63749	0.000135535
A_01_P002845	B3GNT8	UDP-GlcNAc:betaGal beta-1,3-N-acetylglucosaminyltransferase 8	2.63687	0.00204305
A_01_P017728	IL22RA1	interleukin 22 receptor, alpha 1	2.63405	0.000793477
A_01_P019116	KCNK17	potassium channel, subfamily K, member 17	2.62889	0.0054424
A_01_P016996	NAPSA	napsin A aspartic peptidase	2.62747	0.00440938
A_01_P001536	TAS1R2	taste receptor, type 1, member 2	2.62637	0.00098236
A_01_P010346	OR10P1	olfactory receptor, family 10, subfamily P, member 1	2.62183	0.00596515
A_01_P003659	SLC17A6	solute carrier family 17 (sodium-dependent inorganic phosphate cotransporter), member 6	2.61963	0.00298936
A_01_P003175	LOC713391	cyclic AMP-responsive element-binding protein 3-like protein 1-like	2.61609	0.00111318
A_01_P015636	LOC707853	zinc finger CCHC domain-containing protein 13-like	2.61529	0.000636911
A_01_P006732	TMPRSS6	transmembrane protease, serine 6	2.61036	0.00749889
A_01_P008868	USP2	ubiquitin specific peptidase 2	2.6076	0.00687028
A_01_P020054	LPO	lactoperoxidase	2.60714	0.000368833
A_01_P011414	FOXH1	forkhead box H1	2.60691	0.00182893
A_01_P018283	LOC709001	probable G-protein coupled receptor 25-like	2.60593	0.00153756
A_01_P006448	CEACAM4	carcinoembryonic antigen-related cell adhesion molecule 4	2.60585	0.000357367
A_01_P002869	LOC721942	transcription factor HES-7-like	2.60153	0.000227002
A_01_P012791	RPL3L	ribosomal protein L3-like	2.59783	0.00241434
A_01_P002717	TRIM72	tripartite motif containing 72	2.59732	0.00147575
A_01_P006672	GPR68	G protein-coupled receptor 68	2.5969	0.00518885
A_01_P008911	LOC714431	uncharacterized protein C20orf96-like	2.59464	0.000720516
A_01_P005569	CASP2	caspase 2, apoptosis-related cysteine peptidase	2.59452	0.000182799
A_01_P013406	DUSP26	dual specificity phosphatase 26 (putative)	2.58932	0.000356073
A_01_P006263	LOC100429731	myosin-binding protein C, fast-type-like	2.58909	0.00118504
A_01_P019995	CCDC83	coiled-coil domain containing 83	2.5874	0.00106776
A_01_P012887	LOC720271	voltage-dependent calcium channel gamma-7 subunit-like	2.58695	0.000621893
A_01_P006682	LOC699682	keratin, type II cytoskeletal 75-like	2.58625	0.00120355
A_01_P000804	DHRS9	dehydrogenase/reductase (SDR family) member 9	2.58611	0.00839179
A_01_P000375	GPRC5D	G protein-coupled receptor, family C, group 5, member D	2.58601	0.00921786
A_01_P014331	ADAMTS15	ADAM metallopeptidase with thrombospondin type 1 motif, 15	2.58411	0.001139
A_01_P005159	PLAC9	placenta-specific 9	2.58219	0.000155953
A_01_P002028	COL7A1	collagen, type VII, alpha 1"	2.58201	0.000308176
A_01_P007543	UBE4B	ubiquitination factor E4B	2.58181	0.00031528
A_01_P013483	LOC695427	histone H3.2-like	2.57851	0.00252774
A_01_P006615	IL28B	interleukin 28B (interferon, lambda 3)	2.57529	0.000749925
A_01_P005746	GLB1L3	galactosidase, beta 1-like 3	2.57444	0.00353227
A_01_P020142	SPIRE2	spire homolog 2 (Drosophila)	2.57443	0.000416628
A_01_P001890	LOC717965	olfactory receptor 7C2-like	2.57433	0.00335653
A_01_P011515	ASB4	ankyrin repeat and SOCS box containing 4	2.5727	0.000708857
A_01_P010556	ATP8B3	probable phospholipid-transporting ATPase IK-like	2.57223	0.00101501
A_01_P000250	LILRAB	leukocyte immunoglobulin-like receptor, subfamily A, member b	2.57059	0.000295197
A_01_P005582	LOC716472	protein G7c-like	2.56977	0.000305693
A_01_P007708	LOC696704	heat shock protein beta-7-like	2.56886	0.000142706
A_01_P018838	COL20A1	collagen, type XX, alpha 1 (	2.56528	0.000485481
A_01_P000836	MED26	mediator complex subunit 26	2.56482	0.00249592
A_01_P018441	NAF1	nuclear assembly factor 1 homolog (S. cerevisiae)	2.5641	0.000781061
A_01_P007091	LOC100424049	hypothetical protein LOC100424049	2.56191	0.00555059
A_01_P000544	SLC9A10	sodium/hydrogen exchanger 11-like	2.56139	0.000568378
A_01_P015527	LOC719765	protein FAM75A1-like	2.55964	0.00216149
A_01_P013124	TCTE1	t-complex-associated-testis-expressed 1	2.55479	0.00465013
A_01_P014301	ATP1B1	ATPase, Na+/K+ transporting, beta 1 polypeptide	2.55452	0.0039197
A_01_P005877	SLC6A15	solute carrier family 6 (neutral amino acid transporter), member 15	2.55413	0.00122681
A_01_P014035	LOC721818	formimidoyltransferase-cyclodeaminase-like	2.55351	0.000479407
A_01_P003521	RGMA	RGM domain family, member A	2.5527	0.00266271
A_01_P004571	HRASLS5	HRAS-like suppressor family, member 5	2.55239	0.000685532
A_01_P010394	MYBPH	myosin binding protein H	2.55024	0.00253172
A_01_P016758	GPR84	G protein-coupled receptor 84	2.54974	0.0090077
A_01_P018412	NUCKS1	nuclear casein kinase and cyclin-dependent kinase substrate 1	2.54868	0.000196645
A_01_P019225	CHTF8	CTF8, chromosome transmission fidelity factor 8 homolog (S. cerevisiae)	2.54835	0.00341939
A_01_P016462	LOC721901	dynein heavy chain 2, axonemal-like	2.54609	0.00326617
A_01_P019361	KRT14	keratin 14	2.54569	0.000190691
A_01_P008290	LOC716850	hypothetical	2.54382	0.00031393
A_01_P017510	RPL10L	ribosomal protein L10-like	2.54334	0.00150801
A_01_P013753	TMEM63C	transmembrane protein 63C	2.54299	0.00182654
A_01_P015764	LOC718452	olfactory receptor 10H1-like	2.54203	0.00397072
A_01_P013419	GNRHR	gonadotropin-releasing hormone receptor	2.54168	0.000562349
A_01_P012749	IL17B	interleukin 17B	2.54072	0.00043812
A_01_P008031	LOC100427771	elongation factor 1-delta-like	2.54021	0.000216718
A_01_P005351	SERTAD3	SERTA domain containing 3	2.53896	0.00163681
A_01_P010977	CA14	carbonic anhydrase XIV	2.53853	0.0067583
A_01_P002357	MATN1	matrilin 1, cartilage matrix protein	2.53753	0.000356765
A_01_P011218	OTOR	otoraplin	2.53219	0.00882383
A_01_P010642	PIM3	pim-3 oncogene	2.53162	0.00835059
A_01_P012602	FATE1	fetal and adult testis expressed 1	2.53026	0.000273046
A_01_P005656	TUBA1A	tubulin, alpha 1a	2.52917	0.00460189
A_01_P015578	LOC706942	PDZ and LIM domain protein 7-like	2.52902	0.00103921
A_01_P010611	LOC699264	stathmin-2-like	2.52844	0.000587846
A_01_P000492	LOC710062	gamma-aminobutyric acid receptor subunit delta-like	2.52567	0.000494376
A_01_P010320	PTGDS	prostaglandin D2 synthase 21kDa (brain)	2.52509	0.00376756
A_01_P005899	MTAP	methylthioadenosine phosphorylase	2.52085	0.00218422
A_01_P019882	LOC694416	pre-B-cell leukemia transcription factor 1-like	2.52023	0.000714602
A_01_P013215	CRABP1	cellular retinoic acid binding protein 1	2.51935	0.00870991
A_01_P007246	CDHR5	cadherin-related family member 5	2.51913	0.00937153
A_01_P009700	ARL5B	ADP-ribosylation factor-like 5B	2.51792	0.00514029
A_01_P012504	CYYR1	hypothetical LOC708008	2.5174	0.000327472
A_01_P011974	LOC712512	UPF0668 protein C10orf76-like	2.51614	0.00863358
A_01_P008705	LOC711149	melanoma-associated antigen 10-like	2.51524	0.00142232
A_01_P019721	GPSM1	G-protein signaling modulator 1	2.51442	0.000354281
A_01_P000971	NCAPH2	non-SMC condensin II complex, subunit H2	2.51295	0.00725961
A_01_P009717	F2RL1	coagulation factor II (thrombin) receptor-like 1	2.51006	0.00188676
A_01_P015962	WNT11	wingless-type MMTV integration site family, member 11	2.50866	0.00698611
A_01_P005604	LOC700914	LOC700914 hypothetical	2.50824	0.000273046
A_01_P015391	VWA5B1	von Willebrand factor A domain containing 5B1	2.507	0.00204219
A_01_P014729	LOC722714	mannan-binding lectin serine protease 2-like	2.50376	0.00111318
A_01_P019551	LOC100430044	hypothetical LOC100430044	2.50228	0.000133352
A_01_P016938	SAR1B	SAR1 homolog B (S. cerevisiae)	2.50216	0.0037187
A_01_P011804	RTDR1	rhabdoid tumor deletion region gene 1	2.4997	0.000675663
A_01_P015944	PVRL1	poliovirus receptor-related 1 (herpesvirus entry mediator C)	2.49918	0.00382516
A_01_P001695	LOC721299	actin, aortic smooth muscle-like	2.49799	0.00458906
A_01_P012499	ACSM1	acyl-CoA synthetase medium-chain family member 1	2.49619	0.0010547
A_01_P010745	OTUD7A	OTU domain containing 7A	2.4953	0.00729928
A_01_P016553	STX11	syntaxin 11	2.49445	0.00678134
A_01_P006128	LOC718300	galectin-12-like	2.4931	0.00555635
A_01_P005882	LOC707439	microtubule-associated proteins 1A/1B light chain 3A-like	2.49278	0.000506875
A_01_P003008	ELAVL2	ELAV (embryonic lethal, abnormal vision, Drosophila)-like 2 (Hu antigen B)	2.49141	0.00472565
A_01_P018189	FAM107A	family with sequence similarity 107, member A	2.49071	0.00155176
A_01_P009334	LOC719749	trem-like transcript 2 protein-like	2.49051	0.000943639
A_01_P007148	LOC696983	gastrin-releasing peptide-like	2.48884	0.00944778
A_01_P012576	C13orf15	chromosome 13 open reading frame 15	2.48816	0.00152995
A_01_P009525	PRKCG	protein kinase C, gamma	2.48662	0.00397676
A_01_P007173	LOC714397	surfactant-associated protein 2-like	2.48644	0.00177098
A_01_P009312	LOC709814	UPF0672 protein CXorf36-like	2.48637	0.0015548
A_01_P007922	ZC3H18	zinc finger CCCH-type containing 18	2.48629	0.00927995
A_01_P011837	GPR115	G protein-coupled receptor 115	2.48572	0.00156552
A_01_P016103	CTF1	cardiotrophin 1	2.48476	0.00319124
A_01_P000979	SOCS1	suppressor of cytokine signaling 1	2.48283	0.00039826
A_01_P011306	GLUL	glutamate-ammonia ligase	2.48242	0.00388564
A_01_P020072	SCT	secretin	2.48205	0.00110415
A_01_P011670	B4GALNT2	beta-1,4-N-acetyl-galactosaminyl transferase 2	2.48041	0.00186316
A_01_P017483	LOC696664	cystathionine gamma-lyase-like	2.47778	0.000266839
A_01_P013449	AANAT	aralkylamine N-acetyltransferase	2.47738	0.000290037
A_01_P011160	GSTM2	glutathione S-transferase mu 2 (muscle)	2.47678	0.00030268
A_01_P009553	LPCAT4	lysophosphatidylcholine acyltransferase 4	2.47641	0.00274749
A_01_P014190	LOC722098	protein shisa-6 homolog	2.47505	0.000926376
A_01_P012769	LOC720271	voltage-dependent calcium channel gamma-7 subunit-like	2.47438	0.000521359
A_01_P005544	CRP	C-reactive protein, pentraxin-related"	2.47432	0.000680679
A_01_P007467	OPN1LW	red-sensitive opsin-like	2.47411	0.00729928
A_01_P014396	LOC709535	cytochrome P450 4X1-like	2.47348	0.00270637
A_01_P017327	SOCS7	suppressor of cytokine signaling 7-like	2.47304	0.00163665
A_01_P004267	LOC718223	guanine nucleotide-binding protein G(I)/G(S)/G(O) subunit gamma-4-like	2.47291	0.00442426
A_01_P008206	SH3TC2	SH3 domain and tetratricopeptide repeats 2	2.47111	0.000634875
A_01_P019135	PLXNB1	plexin B1	2.47045	0.00789253
A_01_P013286	PTGDS	prostaglandin D2 synthase 21kDa (brain)	2.46939	0.000506875
A_01_P000911	WFIKKN2	WAP, follistatin/kazal, immunoglobulin, kunitz and netrin domain containing 2	2.46929	0.00324408
A_01_P019516	TREM2	triggering receptor expressed on myeloid cells 2	2.46767	0.0086432
A_01_P007142	CALML5	calmodulin-like 5	2.46749	0.000678376
A_01_P014464	EPS8L1	EPS8-like 1	2.4656	0.00188133
A_01_P001106	MCTP2	multiple C2 domains, transmembrane 2	2.46503	0.00439064
A_01_P004373	CLSTN2	calsyntenin 2	2.46426	0.004595
A_01_P018225	CIDEB	cell death-inducing DFFA-like effector b	2.46312	0.00113181
A_01_P000511	LOC710705	uncharacterized protein C11orf53-like	2.46249	0.00163665
A_01_P012064	LOC713205	FAM114A2-like	2.46173	0.0033908
A_01_P002619	LOC703677	hypothetical LOC703677	2.45765	0.000163964
A_01_P004849	LOC695451	myopalladin-like	2.4576	0.0090077
A_01_P013495	LOC703641	neuroblastoma suppressor of tumorigenicity 1-like	2.45573	0.000562349
A_01_P018425	CCDC42	coiled-coil domain containing 42	2.4545	0.00022214
A_01_P018474	IL1RL1	interleukin 1 receptor-like 1	2.45434	0.000218616
A_01_P012044	GOSR1	golgi SNAP receptor complex member 1	2.45231	0.000163964
A_01_P001789	IL17c	interleukin 17C	2.4513	0.000801052
A_01_P005493	TRPC6	transient receptor potential cation channel, subfamily C, member 6	2.44913	0.00562702
A_01_P017400	SLC2A6	solute carrier family 2 (facilitated glucose transporter), member 6	2.4488	0.000200454
A_01_P006775	FCN2	ficolin (collagen/fibrinogen domain containing lectin) 2 (hucolin)	2.44826	0.00139689
A_01_P011159	ENTPD2	ectonucleoside triphosphate diphosphohydrolase 2	2.44764	0.00583557
A_01_P008327	PCK1	phosphoenolpyruvate carboxykinase 1 (soluble)	2.44633	0.00502043
A_01_P018675	SNCB	synuclein, beta	2.44624	0.00271757
A_01_P013324	LOC701917	uncharacterized protein C13orf27-like	2.44588	0.00539741
A_01_P018274	DECR2	2,4-dienoyl CoA reductase 2, peroxisomal	2.44406	0.000308176
A_01_P015453	PAK1IP1	PAK1 interacting protein 1	2.44225	0.00160591
A_01_P019762	SLIT1	slit homolog 1 (Drosophila)	2.44167	0.00396068
A_01_P013452	LOC709905	metallothionein 1B	2.44145	0.000562349
A_01_P001042	SMARCD3	SWI/SNF related, matrix associated, actin dependent regulator of chromatin, d3	2.44112	0.00362325
A_01_P013578	ISX	intestine-specific homeobox	2.43968	0.000336483
A_01_P012895	LOC716298	c-type lectin domain family 4 member D-like	2.43965	0.00825321
A_01_P006276	LOC705065	ras-associated and pleckstrin homology domains-containing protein 1-like	2.43796	0.000461242
A_01_P003709	AHSP	alpha hemoglobin stabilizing protein	2.43789	0.000420693
A_01_P009757	LOC697825	calcium-binding protein 1-like	2.43348	0.000132399
A_01_P002147	SPINK1	serine peptidase inhibitor, Kazal type 1	2.43305	0.000193524
A_01_P004565	LOC711101	hypothetical	2.43278	0.000387434
A_01_P011910	PPP4R2	protein phosphatase 4, regulatory subunit 2	2.43234	0.000967231
A_01_P007498	NOS1	nitric oxide synthase 1 (neuronal)	2.42974	0.00110955
A_01_P008422	TSGA13	testis specific, 13	2.42949	0.00114272
A_01_P004459	P2RY4	pyrimidinergic receptor P2Y, G-protein coupled, 4	2.42734	0.00330312
A_01_P004812	LOC703883	hypothetical	2.42731	0.00197027
A_01_P009817	TH	tyrosine hydroxylase	2.42656	0.000336655
A_01_P014307	CALCB	calcitonin-related polypeptide beta	2.42653	0.00950168
A_01_P007513	RAMP3	receptor (G protein-coupled) activity modifying protein 3	2.42548	0.0019097
A_01_P013817	ZC3HAV1	zinc finger CCCH-type, antiviral 1 (ZC3HAV1)	2.42436	0.00270637
A_01_P018070	LOC719958	olfactory receptor 6N1-like	2.42244	0.0087762
A_01_P008489	IDO1	indoleamine 2,3-dioxygenase 1	2.42221	0.00696813
A_01_P001963	LOC697057	high mobility group protein B2-like	2.42175	0.00613176
A_01_P016737	RHBG	Rh family, B glycoprotein (gene/pseudogene)	2.42093	0.00103272
A_01_P013265	LOC100427044	uncharacterized protein C14orf162 homolog	2.41955	0.00674208
A_01_P012162	LOC716686	receptor expression-enhancing protein 2-like	2.41854	0.000562349
A_01_P010822	GMCL1L	germ cell-less protein-like 1-like	2.41853	0.0028409
A_01_P000952	SUOX	sulfite oxidase (SUOX)	2.41842	0.000265243
A_01_P008979	LOC718147	serine/threonine-protein kinase LMTK2-like	2.41786	0.000281499
A_01_P002709	SSTR5	somatostatin receptor type 5-like	2.41782	0.000498718
A_01_P001621	CDA	cytidine deaminase	2.41735	0.00432936
A_01_P015349	MLN	motilin	2.41438	0.00190138
A_01_P003368	NRG1	neuregulin 1	2.41422	0.0030419
A_01_P009586	IL17RC	interleukin 17 receptor C	2.41328	0.000308176
A_01_P009862	KRT39	keratin 39	2.40975	0.00191131
A_01_P019599	ASB16	ankyrin repeat and SOCS box containing 16	2.40787	0.000516602
A_01_P012782	ZBED1	zinc finger, BED-type containing 1	2.40647	0.00199208
A_01_P017059	WBSCR17	Williams-Beuren syndrome chromosome region 17	2.40544	8.45138e-05
A_01_P005231	PRL	prolactin	2.40191	0.00920859
A_01_P016340	LOC717399	ephrin-A1-like	2.40073	0.000248313
A_01_P008468	CTLA4	cytotoxic T-lymphocyte-associated protein 4	2.39868	0.00290233
A_01_P006531	ACTA2	actin, alpha 2, smooth muscle, aorta	2.3943	0.00185729
A_01_P016107	TFF3	trefoil factor 3 (intestinal)	2.39415	0.00458906
A_01_P009093	LOC100425172	junctional sarcoplasmic reticulum protein 1-like	2.3928	0.00237045
A_01_P020063	TGM6	transglutaminase 6	2.39107	0.00779113
A_01_P010069	SPINK5	serine peptidase inhibitor, Kazal type 5	2.39081	0.000685634
A_01_P013433	GSX2	GS homeobox 2	2.39043	0.00204827
A_01_P016611	SLITRK3	SLIT and NTRK-like family, member 3	2.39031	0.00169018
A_01_P014457	DBNDD1	dysbindin (dystrobrevin binding protein 1) domain containing 1	2.39027	0.00665331
A_01_P011120	ACVRL1	activin A receptor type II-like 1	2.39017	0.000384597
A_01_P018224	LOC100427935	hypothetical	2.39008	0.0087857
A_01_P016680	ADCY10	adenylate cyclase 10 (soluble)	2.38995	0.000162844
A_01_P007997	LOC716959	uncharacterized protein C2orf63 homolog	2.38987	0.00556202
A_01_P001858	BAIAP2L1	BAI1-associated protein 2-like 1	2.38965	0.00829183
A_01_P000901	CLEC4E	C-type lectin domain family 4, member E	2.38913	0.000397356
A_01_P011362	PRLH	prolactin releasing hormone	2.38912	0.000609485
A_01_P004898	hIGFBP	Human insulin-like growth factor binding protein (IGFBP)	2.38909	0.00156552
A_01_P001092	TRPC5	transient receptor potential cation channel, subfamily C, member 5	2.38899	0.005856
A_01_P004840	GSTA3	glutathione S-transferase alpha 3	2.38897	0.00181865
A_01_P010418	LOC100428910	golgin subfamily A member 2-like	2.38765	0.0015889
A_01_P007529	LOC715011	tubulin beta-8 chain-like	2.38738	0.00176217
A_01_P003457	CHRNA6	cholinergic receptor, nicotinic, alpha 6	2.38674	0.00234339
A_01_P006234	HBE1	hemoglobin, epsilon 1	2.38523	0.000843916
A_01_P008448	LOC712881	keratin-associated protein 13-1-like	2.38124	0.000116221
A_01_P003412	FOXJ1	forkhead box J1	2.38074	0.000836787
A_01_P018800	ETF1	eukaryotic translation termination factor 1	2.37909	0.00211133
A_01_P014736	CGB2	chorionic gonadotropin, beta polypeptide 2	2.3773	0.00208149
A_01_P006426	GPX6	glutathione peroxidase 6 (olfactory)	2.377	0.000634875
A_01_P002728	LOC714534	kin of IRRE-like protein 3-like	2.37274	0.00205283
A_01_P016121	LCN1	lipocalin 1 (tear prealbumin)	2.37259	0.000865253
A_01_P017055	BPIFA2	BPI fold containing family A, member 2	2.37222	0.000290037
A_01_P016353	LOC100429040	DNA-directed RNA polymerases I, II, and III subunit RPABC3-like	2.3692	0.000511477
A_01_P019394	ZNF708	zinc finger protein 708	2.36797	0.002974
A_01_P001633	SFTPC	surfactant protein C	2.36794	0.00194498
A_01_P000294	CFB	complement factor B	2.36551	0.000516913
A_01_P005376	LOC693280	uncharacterized protein C11orf66-like	2.36451	0.0027809
A_01_P007190	CHGA	chromogranin A (parathyroid secretory protein 1)	2.36428	0.00383187
A_01_P018331	KCNJ9	potassium inwardly-rectifying channel, subfamily J, member 9	2.36407	0.000918338
A_01_P004214	SOX10	SRY (sex determining region Y)-box 10	2.3639	0.00102973
A_01_P013196	LOC705419	transcription elongation factor A protein-like 4-like	2.36238	0.000286789
A_01_P019651	GPR156	G protein-coupled receptor 156	2.36016	0.000283032
A_01_P000982	NPBWR1	neuropeptides B/W receptor 1	2.35984	0.0009896
A_01_P018998	LOC712610	ETS domain-containing protein Elk-1-like	2.35707	0.000134884
A_01_P019055	C6orf25	chromosome 6 open reading frame 25	2.35383	0.000188455
A_01_P001129	LOC713868	uncharacterized protein C2orf82-like	2.35039	0.000521074
A_01_P003554	LOC715595	protein FAM160B2-like	2.34977	0.000177853
A_01_P015071	PHF19	PHD finger protein 19	2.348	0.000198222
A_01_P011278	NMD3	NMD3 homolog (S. cerevisiae)	2.34761	0.00241364
A_01_P013839	TREM1	triggering receptor expressed on myeloid cells 1	2.34719	0.00788669
A_01_P006291	LOC100423966	trefoil factor 1-like	2.3468	0.00930642
A_01_P012872	PITPNM3	PITPNM family member 3	2.34526	0.000435976
A_01_P017125	PNMA5	paraneoplastic antigen like 5	2.34505	0.00214972
A_01_P012699	CSF3	colony stimulating factor 3 (granulocyte)	2.34468	0.0059425
A_01_P008282	ASPA	aspartoacylase	2.34393	0.000109312
A_01_P016501	SPIC	Spi-C transcription factor (Spi-1/PU.1 related)	2.34172	0.00333188
A_01_P013102	ENG	endoglin-like	2.34078	0.00144393
A_01_P004289	APOE	apolipoprotein E	2.34004	0.00556526
A_01_P003798	MT3	metallothionein 3	2.33952	0.000521359
A_01_P005328	LOC100428875	interleukin-1 family member 10-like	2.33668	0.00431639
A_01_P020037	SLC34A2	solute carrier family 34 (sodium phosphate), member 2	2.33547	0.00383187
A_01_P018744	KCNC1	potassium voltage-gated channel, Shaw-related subfamily, member 1	2.33506	0.00693491
A_01_P015614	LOC714577	CCAAT/enhancer-binding protein delta-like	2.33462	0.000105102
A_01_P009551	LOC701024	aldehyde oxidase-like	2.33306	0.000416628
A_01_P000324	CYP11B1	CYP11B1 cytochrome P450, family 11, subfamily B, polypeptide 1	2.33138	0.000765449
A_01_P014337	SRMS	src-related kinase lacking C-terminal regulatory tyrosine and N-terminal myristylation sites	2.33066	0.00178958
A_01_P019352	LOC717186	DDB1- and CUL4-associated factor 7-like	2.32892	0.00149035
A_01_P011304	NGFR	nerve growth factor receptor	2.32792	0.000678376
A_01_P010547	OLFM1	olfactomedin 1	2.32791	0.000458327
A_01_P017493	LOC715011	tubulin beta-8 chain-like	2.32758	0.00228091
A_01_P016414	LOC713422	acrosomal protein SP-10-like	2.3275	0.00187968
A_01_P004784	LOC721208	protein Dos-like	2.32679	0.00120353
A_01_P006401	S1PR2	sphingosine-1-phosphate receptor 2	2.3256	0.000287502
A_01_P002950	GBA	glucosidase, beta, acid	2.32374	0.000506875
A_01_P010339	LOC706021	hypothetical LOC706021	2.32188	0.000505573
A_01_P006501	LOC718465	voltage-dependent calcium channel gamma-5 subunit-like	2.32149	0.00422404
A_01_P006227	TRIML1	tripartite motif family-like 1	2.3208	0.000356073
A_01_P007768	LOC707236	hypothetical	2.32003	0.00126448
A_01_P005492	ASTN2	astrotactin 2	2.31887	0.000743158
A_01_P004760	LOC717581	g0/G1 switch regulatory protein 2-like	2.31749	0.00680541
A_01_P017175	ZSWIM2	zinc finger, SWIM-type containing 2	2.31611	7.6733e-05
A_01_P009559	CABP2	calcium binding protein 2	2.31536	0.00232133
A_01_P001555	LOC699321	ataxin-3-like	2.31506	0.00281324
A_01_P017641	IL1F6	interleukin 36, alpha	2.31347	0.00720438
A_01_P019051	LOC721886	probable fructose-2,6-bisphosphatase TIGAR-like	2.31341	0.00262312
A_01_P005756	MAGEA3	melanoma antigen family A, 3	2.31212	0.000519825
A_01_P000034	LOC707289	endothelial zinc finger protein induced by tumor necrosis factor alpha-like	2.31139	0.00711159
A_01_P010276	CSF3	colony stimulating factor 3 (granulocyte)	2.31133	0.00727165
A_01_P009148	KCNC2	potassium voltage-gated channel, Shaw-related subfamily, member 2	2.31103	0.00231206
A_01_P012857	RPSA	ribosomal protein SA	2.30961	0.00311705
A_01_P017184	XPO7	exportin-7	2.30906	0.000999567
A_01_P016903	ADAM29	ADAM metallopeptidase domain 29	2.30768	0.00756702
A_01_P016411	SDC1	syndecan 1	2.30735	0.00259884
A_01_P010426	LOC706223	chemokine receptor-like 1-like	2.30734	0.000776237
A_01_P019618	LOC714995	GPN-loop GTPase 2-like	2.30525	0.00401476
A_01_P013907	TRMU	tRNA 5-methylaminomethyl-2-thiouridylate methyltransferase	2.30523	0.000536096
A_01_P009544	CDC37L1	cell division cycle 37 homolog (S. cerevisiae)-like 1	2.30458	0.00091871
A_01_P004337	SLC7A4	solute carrier family 7 (orphan transporter), member 4	2.30442	0.00912616
A_01_P000291	KREMEN2	kremen protein 2-like	2.30431	0.00600916
A_01_P011410	MDFI	MyoD family inhibitor	2.30355	0.00325971
A_01_P008203	LOC711199	FERM and PDZ domain-containing protein 2-like	2.29955	0.00139049
A_01_P006554	LOC722493	insulin-like growth factor-binding protein complex acid labile subunit-like	2.29947	0.000436045
A_01_P000351	LOC696802	stabilin-1-like	2.29928	0.00111545
A_01_P001794	LOC715137	leucine-rich repeat-containing protein 50-like	2.29904	0.000863325
A_01_P004564	LOC709456	collagen alpha-1(XXIII) chain-like	2.29866	8.65239e-05
A_01_P006195	LOC722561	immunoglobulin superfamily member 5-like	2.29847	0.00283926
A_01_P000183	LOC718817	hypothetical	2.29811	0.00116892
A_01_P001264	LOC713905	cation channel sperm-associated protein 3-like	2.29661	0.000445363
A_01_P016443	BTAF1	RNA polymerase II, B-TFIID transcription factor-associated,	2.29632	0.00374324
A_01_P003653	INHA	inhibin, alpha	2.2953	0.000290037
A_01_P018989	NT5C1A	5'-nucleotidase, cytosolic IA	2.29513	0.00182425
A_01_P001793	CHST8	carbohydrate (N-acetylgalactosamine 4-0) sulfotransferase 8 CHST8	2.29261	0.00194376
A_01_P004061	GJD3	gap junction protein, delta 3, 31.9kDa	2.29236	0.00420793
A_01_P013906	SLC39A4	solute carrier family 39 (zinc transporter), member 4	2.2923	0.000649278
A_01_P018325	LOC100423477	ATP-binding cassette sub-family G member 1-like	2.29218	0.000356718
A_01_P006350	DNAJB8	DnaJ (Hsp40) homolog, subfamily B, member 8	2.29189	0.00834082
A_01_P019546	SLC45A2	solute carrier family 45, member 2	2.29125	0.000521359
A_01_P002158	CYP2A26	cytochrome P450, family 2, subfamily A, polypeptide 6	2.29117	0.000265546
A_01_P011224	LOC100428508	secreted Ly-6/uPAR-related protein 2-like	2.29111	0.000866645
A_01_P001645	SLC14A2	solute carrier family 14 (urea transporter), member 2	2.28905	0.00555059
A_01_P012077	CYP26A1	cytochrome P450, family 26, subfamily A, polypeptide 1	2.28876	0.000630388
A_01_P006568	C11orf20	chromosome 11 open reading frame 20	2.28803	0.00830235
A_01_P019659	GAD1	glutamate decarboxylase 1 (brain, 67kDa)	2.28762	0.00098236
A_01_P008512	RENBP	renin binding protein	2.28619	0.00998057
A_01_P018691	ST8SIA2	ST8 alpha-N-acetyl-neuraminide alpha-2,8-sialyltransferase 2	2.28573	0.0042256
A_01_P016381	CGREF1	cell growth regulator with EF hand domain protein 1-like	2.28548	0.000392518
A_01_P016019	KCP	kielin/chordin-like protein	2.28412	0.00556526
A_01_P014378	CRYGA	crystallin, gamma A	2.28349	0.000999567
A_01_P009443	UGT3A1	UDP glycosyltransferase 3 family, polypeptide A1	2.28202	0.0014337
A_01_P019138	OMD	osteomodulin	2.2798	0.00742314
A_01_P001526	CITED2	cbp/p300-interacting transactivator 2-like	2.27951	0.00373217
A_01_P013374	OR52W1	olfactory receptor, family 52, subfamily W, member 1	2.27776	0.00398407
A_01_P019424	SDC4	syndecan 4	2.27633	0.00632841
A_01_P009027	FAT2	FAT tumor suppressor homolog 2 (Drosophila)	2.27623	0.000354281
A_01_P002685	LIPH	lipase, member H	2.27544	0.00316697
A_01_P019140	LHX5	LIM homeobox 5	2.27516	0.001657
A_01_P008089	LOC715506	tetraspanin-18-like	2.27482	0.000918338
A_01_P002192	LOC713492	ADAMTS-like protein 2-like	2.27439	0.00110819
A_01_P009419	AXL	hypothetical LOC706123	2.27375	0.0064863
A_01_P003245	NOD1	nucleotide-binding oligomerization domain containing 1	2.27375	0.000638197
A_01_P004407	ILF3	interleukin enhancer binding factor 3, 90kDa	2.27192	0.000910236
A_01_P012953	LOC718166	hypothetical LOC718166	2.27152	0.0081785
A_01_P018135	ISL1	insulin gene enhancer protein ISL-1-like	2.2711	0.00898747
A_01_P013248	PPP1R1B	protein phosphatase 1, regulatory (inhibitor) subunit 1B	2.271	0.00563823
A_01_P001124	PCDHB1	protocadherin beta 1	2.26833	0.00589609
A_01_P000685	P2RY14	purinergic receptor P2Y, G-protein coupled, 14	2.26667	0.00665664
A_01_P014442	LOC719963	hypothetical LOC719963	2.26597	0.00119378
A_01_P012683	TMEM151A	transmembrane protein 151A	2.2653	0.000650727
A_01_P015534	LOC700034	transcription elongation factor B polypeptide 2-like	2.26326	0.00270365
A_01_P013972	LOC703598	high mobility group protein B3-like	2.26215	0.00799262
A_01_P011357	GRPEL2	GrpE-like 2, mitochondrial (E. coli)	2.26174	0.00439364
A_01_P013182	B3GNT4	UDP-GlcNAc:betaGal beta-1,3-N-acetylglucosaminyltransferase 4	2.26159	0.00217672
A_01_P000667	ELFN2	extracellular leucine-rich repeat and fibronectin type III domain containing 2	2.25983	0.00450076
A_01_P015911	GPR161	G protein-coupled receptor 161	2.25855	0.000621582
A_01_P005286	CRABP2	cellular retinoic acid binding protein 2	2.25837	0.00906251
A_01_P017409	CTRB2	chymotrypsinogen B2	2.25833	0.00548803
A_01_P000727	PGRMC1	progesterone receptor membrane component 1	2.25807	0.00445827
A_01_P009457	RNF19B	e3 ubiquitin-protein ligase RNF19B-like	2.25793	0.00022214
A_01_P009370	C6orf154	chromosome 6 open reading frame 154	2.25768	0.00156085
A_01_P017772	LOC702406	jun dimerization protein 2-like	2.25659	0.000487064
A_01_P011264	B4GALNT3	beta-1,4-N-acetyl-galactosaminyl transferase 3	2.25628	0.00191489
A_01_P019779	SOCS3	suppressor of cytokine signaling 3	2.25591	0.00300735
A_01_P000572	RAB3D	RAB3D, member RAS oncogene family	2.25517	0.00891005
A_01_P005872	TBL3	transducin (beta)-like 3	2.25324	0.00270637
A_01_P004402	LOC719614	potassium voltage-gated channel subfamily KQT member 2-like	2.2513	0.00381807
A_01_P006589	LOC697272	hypothetical LOC697272	2.2512	0.00155454
A_01_P018166	LOC693635	histone H2B type 3-B-like	2.24997	0.000447134
A_01_P000335	PPP1R1B	protein phosphatase 1, regulatory (inhibitor) subunit 1B	2.24935	0.00311074
A_01_P014526	SMC5	structural maintenance of chromosomes 5	2.24838	0.00687415
A_01_P014797	RAB30	RAB30, member RAS oncogene family	2.24815	0.00038585
A_01_P004177	ATP9A	ATPase, class II, type 9A	2.24751	0.00692021
A_01_P012375	LOC100427616	HEAT repeat-containing protein 7A-like	2.24731	0.000218105
A_01_P001666	ANKRD40	ankyrin repeat domain 40	2.2469	0.000481421
A_01_P001597	TAS2R1	taste receptor, type 2, member 1	2.24673	0.00241432
A_01_P010679	STBD1	starch binding domain 1	2.24627	0.00687009
A_01_P008624	LAP3	leucine aminopeptidase 3	2.24559	0.000354398
A_01_P004696	ACY3	aspartoacylase (aminocyclase) 3	2.24545	0.00270365
A_01_P005631	ADAM29	ADAM metallopeptidase domain 29	2.2449	0.00063887
A_01_P012505	ODF2	outer dense fiber of sperm tails 2	2.24435	0.0021794
A_01_P009031	LOC695144	protein C16orf88-like	2.24412	0.000176179
A_01_P019902	LOC100430044	hypothetical LOC100430044	2.24396	0.00113181
A_01_P011936	LOC720072	coiled-coil domain-containing protein 124-like	2.24351	0.00409671
A_01_P015954	CRTAC1	cartilage acidic protein 1	2.24273	0.00103213
A_01_P019959	CTSC	cathepsin C	2.24087	0.00398433
A_01_P003391	C9orf167	chromosome 9 open reading frame 167	2.24006	0.00645396
A_01_P010913	RBMS2	RNA binding motif, single stranded interacting protein 2	2.23992	0.00324398
A_01_P010407	TMEM145	transmembrane protein 145	2.23912	0.00270637
A_01_P000132	LOC720005	rhomboid domain-containing protein 2-like	2.23859	0.000646071
A_01_P018908	PADI1	peptidyl arginine deiminase, type I	2.23771	0.0070352
A_01_P005079	LOC100424982	hypothetical protein LOC100424982	2.23665	0.00208546
A_01_P016863	LOC707198	serine/threonine-protein phosphatase 4 regulatory subunit 4-like	2.2359	0.0026027
A_01_P012331	LOC711743	lipopolysaccharide-induced tumor necrosis factor-alpha factor-like	2.23586	0.00801088
A_01_P004490	C8orf46	chromosome 8 open reading frame 46	2.23189	0.00353108
A_01_P013137	ATP9A	ATPase, class II, type 9A	2.23144	0.00112814
A_01_P007373	HSF4	heat shock factor protein 4-like	2.23136	0.0035946
A_01_P016744	ASPH	aspartate beta-hydroxylase	2.22996	0.000589101
A_01_P004420	LOC716691	hypothetical LOC716691	2.22971	0.00459342
A_01_P008605	VSIG2	V-set and immunoglobulin domain containing 2	2.22869	0.00299505
A_01_P003925	PROP1	PROP paired-like homeobox 1	2.228	0.00290438
A_01_P000772	NR6A1	nuclear receptor subfamily 6, group A, member 1	2.22331	0.00356918
A_01_P006313	LMX1B	LIM homeobox transcription factor 1, beta	2.2231	0.000109003
A_01_P004365	LOC703934	cdc42-interacting protein 4-like	2.22246	8.09697e-05
A_01_P016251	TMPRSS4	transmembrane protease, serine 4	2.22148	0.000922804
A_01_P012276	LOC722628	UPF0184 protein C9orf16-like	2.22025	0.00078785
A_01_P005701	HOXB1	homeobox B1	2.21883	0.00480824
A_01_P003415	HCCS	holocytochrome c synthase (cytochrome c heme-lyase)	2.2188	0.000828873
A_01_P006952	LOC699567	keratin, type II cytoskeletal 2 epidermal-like	2.21674	0.00135411
A_01_P012243	ZNF93	zinc finger protein 93	2.21588	0.00774262
A_01_P013627	LOC702071	protein dachsous-like	2.21563	0.00111431
A_01_P014784	NUP50	nucleoporin 50kDa	2.21526	0.00153448
A_01_P011099	ILF2	interleukin enhancer binding factor 2, 45kDa	2.21486	0.00373996
A_01_P011810	LOC716586	peroxisomal Lon protease homolog 2-like	2.21398	0.0051359
A_01_P000326	CDO1	cysteine dioxygenase, type I	2.21394	0.00721381
A_01_P014125	LOC709340	transmembrane protein 52-like	2.21234	0.00148672
A_01_P018326	LUC7L2	LUC7-like 2 (S. cerevisiae)	2.21178	0.00491383
A_01_P002557	LOC722564	hypothetical LOC722564	2.21087	0.00414644
A_01_P013950	LY6G6C	lymphocyte antigen 6 complex, locus G6C	2.20312	0.00396276
A_01_P007682	LOC100429862	hypothetical protein LOC100429862	2.20292	0.00171406
A_01_P009694	LOC695869	putative uncharacterized protein C13orf28-like	2.20276	0.000865253
A_01_P001960	FGD1	FYVE, RhoGEF and PH domain containing 1	2.20276	0.00164266
A_01_P007785	PREPL	prolyl endopeptidase-like	2.20218	0.00448733
A_01_P007582	ZKSCAN2	zinc finger with KRAB and SCAN domains 2	2.20148	0.000443161
A_01_P007325	PI3	peptidase inhibitor 3, skin-derived	2.19939	0.00493666
A_01_P011483	USF1	upstream transcription factor 1	2.19874	0.00861343
A_01_P009203	GPHB5	glycoprotein hormone beta-5-like	2.1978	0.000317816
A_01_P006815	TGM2	transglutaminase 2	2.19753	0.00118639
A_01_P018582	SIGLEC1	sialic acid binding Ig-like lectin 1, sialoadhesin	2.19714	0.00173554
A_01_P009930	TGIFLX	TGIF-like protein on the X	2.19659	0.00513255
A_01_P008710	OSBPL9	oxysterol binding protein-like 9	2.19552	0.00307502
A_01_P008573	LOC710999	dual specificity tyrosine-phosphorylation-regulated kinase 4-like	2.1935	0.00182706
A_01_P010150	GPR152	G protein-coupled receptor 152	2.19336	0.000583629
A_01_P010759	CA5B	carbonic anhydrase VB, mitochondrial	2.19019	0.000519825
A_01_P003439	PCDHB3	protocadherin beta 3	2.18897	0.00266442
A_01_P000762	OXT	oxytocin, prepropeptide	2.18873	0.00140575
A_01_P012582	RASL12	ras-like protein family member 12-like	2.18755	0.00218422
A_01_P006845	LOC701501	WASH complex subunit 7-like	2.18731	0.00258308
A_01_P000471	LRRC32	leucine rich repeat containing 32	2.18707	0.000447625
A_01_P010835	GPR157	G protein-coupled receptor 157 [Homo sapiens]	2.18686	0.000720516
A_01_P005662	SLC2A3	solute carrier family 2 (facilitated glucose transporter), member 3	2.18585	0.00952436
A_01_P001788	RNF126	ring finger protein 126	2.18517	0.000505573
A_01_P002326	CCDC3	coiled-coil domain containing 3	2.18515	0.00699062
A_01_P009611	ARL4A	ADP-ribosylation factor-like 4A	2.18204	0.00101501
A_01_P008469	CTSW	cathepsin W	2.18083	0.00922349
A_01_P014664	CACNA1S	calcium channel, voltage-dependent, L type, alpha 1S subunit	2.18061	0.00134246
A_01_P017956	LOC100427581	hypothetical protein LOC100427581	2.17793	0.00690268
A_01_P007004	UQCRB	ubiquinol-cytochrome c reductase binding protein	2.17705	0.00262676
A_01_P007316	OCLN	occludin	2.17689	0.00186116
A_01_P017228	FCAMR	Fc receptor, IgA, IgM, high affinity	2.17659	0.00142034
A_01_P003498	PNMA6D	paraneoplastic antigen like 6D	2.17496	0.000942336
A_01_P016337	HOXB13	homeobox B13	2.17433	0.00372449
A_01_P005237	LOC704489	reticulon-4 receptor-like 2-like	2.17327	0.00138602
A_01_P003486	LLGL1	lethal giant larvae homolog 1 (Drosophila)	2.1721	0.000902552
A_01_P019067	FOXD3	forkhead box D3	2.17172	0.0060158
A_01_P003420	UTS2R	urotensin 2 receptor	2.17151	0.00550706
A_01_P007548	UQCR10	ubiquinol-cytochrome c reductase, complex III subunit X	2.17123	0.00102973
A_01_P001521	LOC717040	putative ATP-dependent RNA helicase DDX11-like protein-like	2.17035	0.000873881
A_01_P014773	CRX	cone-rod homeobox	2.16857	0.000449151
A_01_P015412	NFASC	neurofascin	2.16824	0.00605488
A_01_P014794	LTB4R2	leukotriene B4 receptor 2	2.16712	0.0095675
A_01_P000391	CBFA2T3	core-binding factor, runt domain, alpha subunit 2; translocated to, 3	2.16628	0.00115501
A_01_P000484	GAS8	growth arrest-specific 8	2.16616	0.00448733
A_01_P000212	LOC716022	vasodilator-stimulated phosphoprotein-like	2.16479	0.00291982
A_01_P007553	LOC715110	GDNF family receptor alpha-2-like	2.16466	0.00101368
A_01_P008974	KNDC1	kinase non-catalytic C-lobe domain (KIND) containing 1	2.16311	0.00141605
A_01_P013583	KCNIP2	Kv channel interacting protein 2	2.16309	0.0026027
A_01_P004163	BMP1	bone morphogenetic protein 1	2.16275	0.00778361
A_01_P013025	GABRE	gamma-aminobutyric acid (GABA) A receptor, epsilon	2.16204	0.00362323
A_01_P002053	STAT2	signal transducer and activator of transcription 2, 113kDa	2.16203	0.000290037
A_01_P000517	LOC716859-	hypothetical LOC716859	2.15963	0.00403735
A_01_P013309	NOS2	nitric oxide synthase 2, inducible	2.158	0.00149857
A_01_P006253	HIF3A	hypoxia inducible factor 3, alpha subunit	2.15678	0.0029186
A_01_P005681	LOC695413	transmembrane protein 110-like	2.15676	0.0039381
A_01_P015629	LOC717916	homeobox protein BarH-like 1-like	2.1555	0.00132362
A_01_P019770	LOC710186	cysteine-rich protein 2-like	2.1536	0.000416628
A_01_P001590	LTBP1	latent transforming growth factor beta binding protein 1	2.15346	0.000652636
A_01_P019880	KIFAP3	kinesin-associated protein 3	2.15331	0.00215662
A_01_P015459	LOC720855	UPF0691 protein C9orf116-like	2.15257	0.00662883
A_01_P013786	MRAP	melanocortin 2 receptor accessory protein	2.15225	0.00148117
A_01_P011923	RASA4	RAS p21 protein activator 4	2.15202	0.00158638
A_01_P008204	GCHFR	GTP cyclohydrolase I feedback regulator	2.15161	0.00578762
A_01_P010514	COMP	cartilage oligomeric matrix protein	2.15148	0.00272732
A_01_P002491	MYBPC1	myosin binding protein C, slow type	2.15095	0.000883415
A_01_P006024	C7orf62	chromosome 7 open reading frame 62	2.1506	0.00287957
A_01_P014538	MRAP2	melanocortin 2 receptor accessory protein 2	2.1504	0.00621724
A_01_P020016	LOC708235	acyl-CoA-binding domain-containing protein 5-like	2.1498	0.00344764
A_01_P016454	UBE2T	ubiquitin-conjugating enzyme E2 T-like	2.14932	0.00344159
A_01_P013618	LOC699131	FAM135B-like	2.14885	0.00068002
A_01_P007145	LOC721106	serine protease 1-like protein 1-like	2.14874	0.00411926
A_01_P005547	UBE2V1	ubiquitin-conjugating enzyme E2 variant 1	2.14804	0.000354281
A_01_P000208	RARRES2	retinoic acid receptor responder (tazarotene induced) 2	2.14657	0.00274686
A_01_P000755	LOC712220	p protein-like	2.14598	0.000725846
A_01_P018538	MXD1	MAX dimerization protein 1	2.14511	0.00437131
A_01_P016669	ASPHD2	aspartate beta-hydroxylase domain containing 2	2.14425	0.00156419
A_01_P002614	PCNXL2	pecanex-like 2 (Drosophila)	2.14124	0.000816585
A_01_P002068	FCGR1	high affinity immunoglobulin gamma Fc receptor I	2.13841	0.000562349
A_01_P009581	CETN1	centrin, EF-hand protein, 1	2.13671	0.00408732
A_01_P007583	WDR33	WD repeat domain 33	2.13545	0.00251854
A_01_P008631	GAL3ST3	galactose-3-O-sulfotransferase 3	2.1344	0.000481227
A_01_P000775	SLC6A7	solute carrier family 6 (neurotransmitter transporter, L-proline), member 7	2.13372	0.00752282
A_01_P003575	SPINK7	serine peptidase inhibitor, Kazal type 7 (putative)	2.13337	0.00243939
A_01_P014078	KCNG4	potassium voltage-gated channel, subfamily G, member 4	2.13269	0.00539741
A_01_P016150	CACNA1C	calcium channel, voltage-dependent, L type, alpha 1C subunit	2.13205	0.00121683
A_01_P015960	ID2	DNA-binding protein inhibitor ID-2-like	2.13046	0.00441974
A_01_P012553	ZNF804B	zinc finger protein 804B	2.12952	0.00256708
A_01_P019254	DIO2	deiodinase, iodothyronine, type II	2.12951	0.00180969
A_01_P005499	RXRG	retinoid X receptor, gamma	2.12694	0.000638197
A_01_P014628	TSKU	tsukushi small leucine rich proteoglycan homolog (Xenopus laevis)	2.12636	0.000294261
A_01_P017647	LOC704982	spermatogenesis-associated protein 12-like	2.12447	0.00823994
A_01_P006693	GCH1	GTP cyclohydrolase 1	2.12386	0.00125901
A_01_P020136	TSPAN10	tetraspanin 10	2.12352	0.00654401
A_01_P016850	VTN	vitronectin	2.12345	0.00187565
A_01_P004306	LOC710210	uncharacterized protein C2orf65-like	2.12332	0.000354281
A_01_P012682	SPEF1	sperm flagellar 1	2.12306	0.00356918
A_01_P014761	LOC709729	transmembrane protein 56-like	2.12288	0.00293942
A_01_P009241	IP6K3	inositol hexakisphosphate kinase 3	2.12266	0.00326514
A_01_P016218	DUSP9	dual specificity phosphatase 9	2.12254	0.000494376
A_01_P000713	LOC714136	3 beta-hydroxysteroid dehydrogenase type 7-like	2.12247	0.00372771
A_01_P005089	OCEL1	occludin/ELL domain containing 1	2.12148	0.000657914
A_01_P018617	LOC703821	protein phosphatase 1 regulatory inhibitor subunit 16B-like	2.12016	0.00175089
A_01_P007187	SNX12	sorting nexin 12	2.11912	0.00330091
A_01_P001014	LOC709543	uncharacterized protein C20orf144-like	2.1184	0.00539828
A_01_P017253	SLC4A3	solute carrier family 4, anion exchanger, member 3	2.11647	0.00198919
A_01_P004446	CCDC78	coiled-coil domain containing 78	2.11643	0.00358359
A_01_P000269	UBXN11	UBX domain protein 11	2.11641	0.00073992
A_01_P014182	LOC100428924	olfactory receptor 2F2-like	2.11625	0.000451798
A_01_P004246	FFAR1	free fatty acid receptor 1	2.1157	0.00430274
A_01_P007202	MRGPRX1	MAS-related GPR, member X1	2.11511	0.000325739
A_01_P003774	CYB561	Similar to Homo sapien cytochrome b-561 [Homo sapiens]	2.1147	0.000331772
A_01_P009200	ARRDC3	arrestin domain containing 3	2.1144	0.00198885
A_01_P001099	LOC698292	cell division protein kinase 19-like	2.1137	0.00039826
A_01_P009745	LOC695259	BEAN-like	2.11226	0.000356933
A_01_P010201	ZNF628	n-acetyltransferase 14-like	2.11199	0.00250085
A_01_P002446	EMX1	empty spiracles homeobox 1	2.11066	0.000563887
A_01_P015659	LOC716331	hypothetical	2.11017	0.00516338
A_01_P013707	C10orf10	chromosome 10 open reading frame 10	2.10897	0.000636911
A_01_P013861	TNFAIP3	tumor necrosis factor, alpha-induced protein 3	2.10878	0.000494376
A_01_P001735	PLCB3	phospholipase C, beta 3 (phosphatidylinositol-specific)	2.10877	0.00242998
A_01_P008439	POLR2K	polymerase (RNA) II (DNA directed) polypeptide K, 7.0kDa	2.10865	0.0026027
A_01_P004808	LOC720018	FCH domain only protein 1-like	2.10849	0.00274829
A_01_P019772	OR10G7	olfactory receptor, family 10, subfamily G, member 7	2.1078	0.00704452
A_01_P002156	CD200	CD200 molecule	2.10764	0.000680679
A_01_P013155	LOC721854	MPN domain-containing protein-like	2.10552	0.00132461
A_01_P016186	GTF3C4	general transcription factor IIIC, polypeptide 4, 90kDa	2.1055	0.00528942
A_01_P017887	PPY	pancreatic polypeptide	2.10385	0.00337694
A_01_P014247	PACSIN1	protein kinase C and casein kinase substrate in neurons 1	2.10314	0.00745291
A_01_P010257	RRAGC	Ras-related GTP binding C	2.10208	0.000163964
A_01_P018948	NOTUM	notum pectinacetylesterase homolog (Drosophila)	2.10185	0.000460467
A_01_P017546	KCNK12	potassium channel, subfamily K, member 12	2.10136	0.00040767
A_01_P014277	NFKBIB	nuclear factor of kappa light polypeptide gene enhancer in B-cells inhibitor, beta	2.09907	0.00219223
A_01_P011327	LOC700414	hypothetical LOC700414	2.09876	0.00168681
A_01_P007931	TRPM5	transient receptor potential cation channel, subfamily M, member 5	2.09628	0.000700179
A_01_P005497	SPACA1	sperm acrosome associated 1	2.0952	0.000694694
A_01_P012033	LOC717477	EH domain-containing protein 2-like	2.09396	0.00509285
A_01_P000879	GHSR	growth hormone secretagogue receptor	2.09352	0.00123737
A_01_P016158	LOC717124	insulin growth factor-like family member 1-like	2.09214	0.00693514
A_01_P002788	KLKB1	kallikrein B, plasma (Fletcher factor) 1	2.09127	0.00125901
A_01_P011902	GGTLC3	gamma-glutamyltransferase light chain 3	2.09081	0.000494376
A_01_P019685	IPO4	importin-4-like	2.08801	0.00188005
A_01_P004596	PRSS27	protease, serine 27	2.0878	0.0038244
A_01_P016465	LOC698852	zinc finger protein 385D-like	2.08764	0.00360587
A_01_P006543	POLE	polymerase (DNA directed), epsilon	2.08724	0.00116328
A_01_P012012	LOC700889	synaptotagmin-like protein 4-like	2.0871	0.00996033
A_01_P008643	KPNA2	karyopherin alpha 2 (RAG cohort 1, importin alpha 1)	2.08429	0.00609864
A_01_P014363	JUP	junction plakoglobin	2.0831	0.00142232
A_01_P016728	LOC700127	WD repeat-containing protein KIAA1875-like	2.08079	0.00873422
A_01_P008714	RC3H2	ring finger and CCCH-type domains 2	2.08029	0.00990998
A_01_P017743	JUP	junction plakoglobin	2.07962	0.000884281
A_01_P017971	EPHX3	epoxide hydrolase 3	2.07958	0.00214972
A_01_P015331	LOC100426861	vasorin-like	2.07831	0.00168056
A_01_P017925	LOC716420	protein FAM76A-like	2.07742	0.00198545
A_01_P003559	PLA2G4D	phospholipase A2, group IVD (cytosolic)	2.07645	0.000460467
A_01_P002791	TINAGL1	tubulointerstitial nephritis antigen-like 1	2.07619	0.00339088
A_01_P019403	RBM34	RNA binding motif protein 34	2.07579	0.00600038
A_01_P005532	FGF19	fibroblast growth factor 19	2.07541	0.0067603
A_01_P000049	MARVELD2	MARVEL domain containing 2	2.07541	0.000955145
A_01_P004514	CNTNAP3	contactin associated protein-like 3	2.075	0.00140575
A_01_P002698	FZD4	frizzled family receptor 4	2.07392	0.00235174
A_01_P019149	KRT4	keratin 4	2.07162	0.000393435
A_01_P008330	SLC30A3	solute carrier family 30 (zinc transporter), member 3	2.07064	0.00110436
A_01_P004225	PELI3	pellino homolog 3 (Drosophila)	2.07029	0.0002715
A_01_P014914	LOC702013	paired box protein Pax-7-like	2.0698	0.000197993
A_01_P013909	LOC720001	heat shock 70 kDa protein 6-like	2.06922	0.00644879
A_01_P003167	ARHGEF16	Rho guanine nucleotide exchange factor (GEF) 16	2.06815	0.00263878
A_01_P018239	LOC718626	leucine zipper protein 1-like	2.06797	0.00326121
A_01_P017620	ODC1	ornithine decarboxylase 1	2.06785	0.0022131
A_01_P002298	CDC42EP2	CDC42 effector protein (Rho GTPase binding) 2	2.06696	0.000356933
A_01_P006937	RIPK4	receptor-interacting serine-threonine kinase 4	2.06592	0.00300316
A_01_P006464	OR6X1	olfactory receptor, family 6, subfamily X, member 1	2.06581	0.000650727
A_01_P001888	SP2	Sp2 transcription factor	2.06569	0.00902581
A_01_P016316	TWIST2	twist homolog 2 (Drosophila)	2.06477	0.000440373
A_01_P006060	SPINK2	serine protease inhibitor Kazal-type 2-like	2.06443	0.000485435
A_01_P017744	CCS	copper chaperone for superoxide dismutase	2.06341	0.0027766
A_01_P014154	ESPNL	espin-like	2.0632	0.000354281
A_01_P015159	OR6M1	olfactory receptor, family 6, subfamily M, member 1	2.06313	0.00384219
A_01_P018141	CADM3	cell adhesion molecule 3	2.06189	0.000992412
A_01_P018105	TCEB3	transcription elongation factor B (SIII), polypeptide 3	2.0609	0.00376377
A_01_P001221	LOC717335	heparan sulfate glucosamine 3-O-sulfotransferase 6-like	2.0598	0.00300533
A_01_P014867	RAB8B	RAB8B, member RAS oncogene family	2.05921	0.00613714
A_01_P005595	PLEKHN1	pleckstrin homology domain containing, family N member 1	2.05872	0.00616959
A_01_P005098	LOC719747	signaling lymphocytic activation molecule-like	2.05841	0.00137888
A_01_P015007	LOC714424	doublesex- and mab-3-related transcription factor B1-like	2.05703	0.000149532
A_01_P002189	LOC712789	nucleolar and coiled-body phosphoprotein 1-like	2.05677	0.00695021
A_01_P010678	ACSM2B	acyl-CoA synthetase medium-chain family member 2B	2.05665	0.00275306
A_01_P018866	USF2	upstream transcription factor 2, c-fos interacting	2.05632	0.00282161
A_01_P020032	H2AFJ	H2A histone family, member J	2.05618	0.000634875
A_01_P010342	RAB8B	RAB8B, member RAS oncogene family	2.05557	0.00944778
A_01_P016175	LOC708341	protein shisa-4-like	2.05481	0.003344
A_01_P006098	ITGB2	integrin beta-2-like	2.05465	8.09697e-05
A_01_P017613	AP1M2	adaptor-related protein complex 1, mu 2 subunit	2.05465	0.00285493
A_01_P001832	LOC705469	histone H2A type 1-like	2.05384	0.00401738
A_01_P010236	SLU7	SLU7 splicing factor homolog (S. cerevisiae)	2.05343	0.00869535
A_01_P011485	TUFT1	tuftelin 1	2.05202	0.00527468
A_01_P004304	LOC722232	cornifelin-like	2.05192	0.00091871
A_01_P006487	SLC2A4	solute carrier family 2 (facilitated glucose transporter), member 4	2.05174	0.00804436
A_01_P009164	ACPT	acid phosphatase, testicular	2.05131	0.00408295
A_01_P012511	USP30	ubiquitin specific peptidase 30	2.04967	0.00767196
A_01_P001982	AP3B2	adaptor-related protein complex 3, beta 2 subunit	2.04904	0.0015548
A_01_P010403	SPAG4	sperm associated antigen 4	2.04836	0.0081785
A_01_P015424	FEM1B	fem-1 homolog b (C. elegans)	2.04642	0.00638458
A_01_P016759	LOC707931	ankyrin repeat and SOCS box protein 12-like	2.04628	0.00112076
A_01_P010073	CLCNKA	chloride channel Ka	2.04522	0.00249838
A_01_P006936	CTXN1	cortexin 1	2.04491	0.00488514
A_01_P004523	IFRD1	interferon-related developmental regulator 1	2.04324	0.00182115
A_01_P004292	GABPAP	GA binding protein transcription factor, alpha subunit pseudogene	2.04154	0.000519825
A_01_P001249	PDXK	pyridoxal (pyridoxine, vitamin B6) kinase	2.04065	0.000356073
A_01_P020154	FOXP4	forkhead box P4	2.04044	0.000902098
A_01_P016880	LOC706393	hypothetical LOC706393	2.04043	0.00150657
A_01_P014271	UPP1	uridine phosphorylase 1	2.04007	0.00969812
A_01_P010139	LOC709427	erythrocyte membrane protein band 4.2-like	2.03985	0.00257575
A_01_P008640	LOC100423625	hypothetical protein LOC100423625	2.03927	0.00346804
A_01_P011387	SLC6A11	solute carrier family 6 (neurotransmitter transporter, GABA), member 11	2.03763	0.00112552
A_01_P003690	DCT	dopachrome tautomerase (dopachrome delta-isomerase, tyrosine-related protein 2)	2.03755	0.00270637
A_01_P009355	WWOX	WW domain containing oxidoreductase	2.03664	0.00427827
A_01_P004213	LOC696911	harmonin-like	2.03653	0.000243474
A_01_P004503	INHBC	inhibin, beta C	2.03591	0.0086432
A_01_P016002	TSPAN1	tetraspanin 1	2.03541	0.00143103
A_01_P008478	LOC706408	checkpoint protein HUS1B-like	2.03433	0.0052255
A_01_P001162	GRPEL1	GrpE-like 1, mitochondrial (E. coli)	2.0342	0.00633306
A_01_P006621	IL1RL2	interleukin 1 receptor-like 2	2.03291	0.00388677
A_01_P000149	MLH3	mutL homolog 3	2.03131	0.000994567
A_01_P005227	TGM2	transglutaminase 2	2.03122	0.00951354
A_01_P007242	CPZ	carboxypeptidase Z (CPZ)	2.02835	0.00103838
A_01_P019680	ONECUT2	one cut homeobox 2	2.02822	0.004595
A_01_P011690	LOC721628	phospholemman-like	2.02821	0.000309438
A_01_P009790	LOC713250	high mobility group protein B1-like	2.02758	0.000298528
A_01_P000958	FAM86A	family with sequence similarity 86, member A	2.02646	0.00121253
A_01_P002410	LOC715846	transmembrane protein 120A-like	2.02484	0.00268963
A_01_P006985	RMND5A	required for meiotic nuclear division 5 homolog A (S. cerevisiae)	2.02433	0.000884281
A_01_P016026	WDR66	WD repeat domain 66	2.02312	0.00232974
A_01_P008537	LOC693672	uncharacterized protein C16orf78-like	2.02295	0.000765751
A_01_P008285	AQP7	aquaporin 7	2.02268	0.000610138
A_01_P009261	EIF4A1	eukaryotic translation initiation factor 4A1	2.02126	0.00316697
A_01_P015016	LEP	leptin	2.02092	0.00276948
A_01_P006686	LOC100427476	hypothetical protein LOC100427476	2.02063	0.00382516
A_01_P011807	POLR1C	polymerase (RNA) I polypeptide C, 30kDa	2.01943	0.00968928
A_01_P017544	TAP2	antigen peptide transporter 2-like	2.01899	0.000381332
A_01_P015254	CCRL1	chemokine (C-C motif) receptor-like 1	2.01829	0.00123555
A_01_P005689	LOC723001	olfactory receptor 7D4-like	2.01747	0.00666621
A_01_P014480	LOC718480	peptidoglycan recognition protein 1-like	2.01627	0.00539828
A_01_P000041	MGC33894	ranscript expressed during hematopoiesis 2	2.01411	0.00073171
A_01_P002715	EEF1A2	eukaryotic translation elongation factor 1 alpha 2	2.01392	0.00491383
A_01_P004816	NOC4L	nucleolar complex associated 4 homolog (S. cerevisiae)	2.01363	0.00839759
A_01_P010565	FRMD1	FERM domain containing 1	2.01338	0.00427827
A_01_P001475	SLC22A8	solute carrier family 22 (organic anion transporter), member 8	2.01211	0.0054424
A_01_P016330	LOC719648	sialic acid-binding Ig-like lectin 11-like	2.01164	0.0067928
A_01_P004746	RBMX2	RNA binding motif protein, X-linked 2	2.0109	0.0053694
A_01_P013084	FOLR1	folate receptor 1 (adult)	2.00992	0.000557275
A_01_P001743	RBM18	RNA binding motif protein 18	2.00723	0.00475655
A_01_P019313	LOC100423330	hypothetical protein LOC100423330	2.00317	0.00965542
A_01_P007425	ZNHIT3	zinc finger, HIT-type containing 3	2.00185	0.00828918
A_01_P005761	TREH	trehalase (brush-border membrane glycoprotein)	2.00046	0.00270637
A_01_P019099	LOC703939	UDP-GalNAc:beta-1,3-N-acetylgalactosaminyltransferase 1-like	-2.00026	0.00670291
A_01_P002338	ST7	suppression of tumorigenicity 7	-2.00061	0.00271092
A_01_P002426	CHRNA10	cholinergic receptor, nicotinic, alpha 10	-2.00076	0.000396479
A_01_P003672	HARBI1	harbinger transposase derived 1	-2.00084	0.00131449
A_01_P002146	TMEM155	transmembrane protein 155	-2.00097	0.00302067
A_01_P015919	LOC100430132	mRNA cap guanine-N7 methyltransferase-like	-2.00234	0.00284435
A_01_P013227	GCN1L1	GCN1 general control of amino-acid synthesis 1-like 1 (yeast)	-2.00309	0.000283032
A_01_P007696	ISLR	immunoglobulin superfamily containing leucine-rich repeat	-2.00358	0.00155238
A_01_P015414	TRAPPC10	trafficking protein particle complex 10	-2.00363	0.00245748
A_01_P007027	DCAF4	DDB1 and CUL4 associated factor 4	-2.00388	0.000271456
A_01_P006861	G3BP1	GTPase activating protein (SH3 domain) binding protein 1	-2.00414	0.00144393
A_01_P003485	MTMR9	myotubularin related protein 9	-2.00471	0.00110111
A_01_P002278	ABCC10	ATP-binding cassette, sub-family C (CFTR/MRP), member 10	-2.00527	0.000793477
A_01_P003617	C9orf64	chromosome 9 open reading frame 64	-2.00617	0.0005344
A_01_P009677	LOC100430437	ADP-ribosylation factor-like protein 5A-like	-2.00754	0.000876548
A_01_P007536	RNF112	ring finger protein 112	-2.00861	0.00197837
A_01_P009970	RNF43	ring finger protein 43	-2.00869	0.000699981
A_01_P008580	LOC711321	hypothetical LOC711321	-2.00871	0.00207454
A_01_P012909	LOC709915	protein FAM122A-like	-2.0094	0.00174044
A_01_P000321	LOC720264	rho GTPase-activating protein 30-like	-2.00946	0.00436967
A_01_P008498	LGALS4	lectin, galactoside-binding, soluble, 4	-2.00965	0.00218422
A_01_P008125	TRMT5	TRM5 tRNA methyltransferase 5 homolog (S. cerevisiae)	-2.01088	0.00338955
A_01_P018421	DFFA	DNA fragmentation factor, 45kDa, alpha polypeptide	-2.01146	0.00436647
A_01_P005923	NNT	Similar to Homo sapiens nicotinamide nucleotide transhydrogenase (NNT)	-2.01208	0.00644879
A_01_P006298	C3orf31	TAM41, mitochondrial translocator assembly and maintenance protein, homolog (S. cerevisiae)	-2.01248	0.00819584
A_01_P011836	LEDGF	lens epithelium-derived growth factor	-2.013	0.00381807
A_01_P011164	MTBP	Mdm2, transformed 3T3 cell double minute 2, p53 binding protein (mouse) binding protein, 104kDa	-2.01582	0.00729928
A_01_P005628	BFAR	bifunctional apoptosis regulator	-2.01588	0.00196618
A_01_P007158	CTDSP2	CTD (carboxy-terminal domain, RNA polymerase II, polypeptide A) small phosphatase 2	-2.01614	0.000873881
A_01_P015064	CDH26	cadherin 26	-2.01897	0.00379903
A_01_P016293	DHX35	DEAH (Asp-Glu-Ala-His) box polypeptide 35	-2.01939	0.00150859
A_01_P019417	THAP8	THAP domain containing 8	-2.01998	0.00142232
A_01_P003331	VPS39	vacuolar protein sorting 39 homolog (S. cerevisiae)	-2.02202	0.00027199
A_01_P013049	HECTD1	HECT domain containing 1	-2.02282	0.00382237
A_01_P018956	LOC706437	lysine-specific demethylase 5B-like	-2.0229	0.00437165
A_01_P006093	LOC708399	zinc finger protein 416-like	-2.02331	0.000210205
A_01_P009523	NSD1	nuclear receptor binding SET domain protein 1	-2.02336	0.00580743
A_01_P016122	LOC693342	nuclear receptor coactivator 1-like	-2.02379	0.00444514
A_01_P002835	DPP8	dipeptidyl-peptidase 8	-2.02431	0.00815699
A_01_P011556	WNT10B	wingless-type MMTV integration site family, member 10B	-2.02449	0.0002525
A_01_P006774	C11orf52	chromosome 11 open reading frame 52	-2.02482	0.000147969
A_01_P011821	ABLIM1	actin binding LIM protein 1	-2.02672	0.00350486
A_01_P002953	TSGA10	testis specific, 10	-2.02674	0.00779239
A_01_P000539	LOC710234	transcription factor 7-like	-2.02701	0.00206587
A_01_P006929	NOL3	nucleolar protein 3 (apoptosis repressor with CARD domain)	-2.02797	0.00789284
A_01_P012662	LOC693342	nuclear receptor coactivator 1-like	-2.02807	0.00496337
A_01_P014796	LOC718717	ras-related protein Rab-6A-like	-2.02819	0.00621102
A_01_P009391	SEC63	SEC63 homolog (S. cerevisiae)	-2.02971	0.00670966
A_01_P000311	KRT33B	keratin 33B	-2.03057	0.000645233
A_01_P007961	ZNF343	zinc finger protein 343	-2.03183	0.000763545
A_01_P011889	LOC100429202	t-box transcription factor TBX1-like	-2.03269	0.0015658
A_01_P000265	DLL1	delta-like protein 1-like	-2.03314	0.00647083
A_01_P013539	SMARCD3	SWI/SNF related, matrix associated, actin dependent regulator of chromatin, d3	-2.03326	0.00325926
A_01_P017605	LOC718571	major centromere autoantigen B-like	-2.03336	0.000589249
A_01_P011540	C12orf4	chromosome 12 open reading frame 4	-2.03485	0.0046365
A_01_P003178	IARS2	isoleucyl-tRNA synthetase 2, mitochondrial	-2.03497	0.00697173
A_01_P007350	TGFBR1	transforming growth factor, beta receptor 1	-2.03565	0.000479407
A_01_P004726	RNPC3	RNA-binding region (RNP1, RRM) containing 3	-2.03603	0.00281667
A_01_P009748	BCORL1	BCL6 corepressor-like 1	-2.03656	0.00447479
A_01_P018404	BACH2	BTB and CNC homology 1, basic leucine zipper transcription factor 2	-2.03756	0.000918338
A_01_P006447	DPP8	dipeptidyl-peptidase 8	-2.03792	0.00101183
A_01_P014188	UNC45B	unc-45 homolog B (C. elegans)	-2.03912	0.00274866
A_01_P006389	RPS6KB1	ribosomal protein S6 kinase, 70kDa, polypeptide 1	-2.04093	0.00765265
A_01_P018161	LOC702924	probable saccharopine dehydrogenase-like	-2.04274	0.000933566
A_01_P010511	LOC701067	AP2-associated protein kinase 1-like	-2.0443	0.00891993
A_01_P020030	KLHL24	kelch-like protein 35-like	-2.0465	0.00074927
A_01_P009099	CAB39L	calcium binding protein 39-like	-2.04728	0.0021654
A_01_P006068	LOC718976	mitogen-activated protein kinase 14-like	-2.04742	0.000752318
A_01_P003749	DPY19L1	dpy-19-like 1 (C. elegans)	-2.0478	0.000577298
A_01_P017095	MLL3	myeloid/lymphoid or mixed-lineage leukemia 3	-2.04814	0.0064135
A_01_P002085	ACVR1B	activin A receptor, type IB	-2.0496	0.0022131
A_01_P000177	KCNAB1	potassium voltage-gated channel, shaker-related subfamily, beta member 1	-2.05011	0.00903824
A_01_P001381	LOC717481	tRNA-splicing endonuclease subunit Sen15-like	-2.05011	0.00064763
A_01_P002438	ILF3	interleukin enhancer binding factor 3, 90kDa	-2.05018	0.000393435
A_01_P008807	SLC39A10	solute carrier family 39 (zinc transporter), member 10	-2.05055	0.00106605
A_01_P001974	ADAM32	ADAM metallopeptidase domain 32	-2.05191	0.00475655
A_01_P009173	SEPT8	septin 8	-2.0533	0.000510442
A_01_P013257	MLL3	myeloid/lymphoid or mixed-lineage leukemia 3	-2.05386	0.00352876
A_01_P003301	WFIKKN1	WAP, follistatin/kazal, immunoglobulin, kunitz and netrin domain containing 1	-2.05522	0.00913389
A_01_P018980	DCLRE1A	DNA cross-link repair 1A	-2.0574	0.00158018
A_01_P010298	KLHL9	kelch-like 9 (Drosophila)	-2.05817	0.000865249
A_01_P006461	IFT74	intraflagellar transport 74 homolog (Chlamydomonas)	-2.05885	0.00203852
A_01_P010820	MANSC1	MANSC domain containing 1	-2.05934	0.00490645
A_01_P010480	LOC704689	protein ZNF673-like	-2.05959	0.000731808
A_01_P017265	LRRCC1	leucine rich repeat and coiled-coil domain containing 1	-2.05975	0.000311114
A_01_P003870	LOC717608	nuclear pore complex protein Nup98-Nup96-like	-2.06026	0.00115618
A_01_P010766	OXER1	oxoeicosanoid (OXE) receptor 1	-2.0606	0.0091751
A_01_P011724	TMED6	transmembrane emp24 protein transport domain containing 6	-2.06099	0.000427207
A_01_P007462	GLB1	galactosidase, beta 1	-2.061	0.00104063
A_01_P013134	ACTR8	ARP8 actin-related protein 8 homolog (yeast)	-2.06182	0.0058462
A_01_P001972	LOC707723	glycerol-3-phosphate dehydrogenase 1-like protein-like	-2.06197	0.00930046
A_01_P006987	LOC720244	zinc finger protein 83-like	-2.06264	0.00188083
A_01_P020182	SNPH	syntaphilin	-2.06308	0.00262312
A_01_P014962	LOC717459	constitutive coactivator of PPAR-gamma-like protein 1-like	-2.06335	0.00059826
A_01_P005534	SLC18A2	solute carrier family 18 (vesicular monoamine), member 2	-2.06362	0.00759145
A_01_P013635	LOC710588	inositol hexakisphosphate and diphosphoinositol-pentakisphosphate kinase 1-like	-2.06702	0.000163964
A_01_P016979	ZNF415	zinc finger protein 415	-2.0678	0.00519374
A_01_P007321	GPR61	G protein-coupled receptor 61	-2.06982	0.00795766
A_01_P003722	LOC707785	uncharacterized protein KIAA1109-like	-2.07035	0.000672656
A_01_P008071	LOC707459	leukemia-associated protein 1-like	-2.07048	0.00089681
A_01_P009928	FGF2	fibroblast growth factor 2 (basic)	-2.07138	0.00276294
A_01_P015448	GCLC	glutamate-cysteine ligase, catalytic subunit	-2.07176	0.0033572
A_01_P003568	AHCYL2	adenosylhomocysteinase-like 2	-2.07213	0.00319064
A_01_P014643	PTPN22	protein tyrosine phosphatase, non-receptor type 22 (lymphoid)	-2.0724	0.00149643
A_01_P008906	G2E3	G2/M-phase specific E3 ubiquitin protein ligase	-2.07271	0.000510817
A_01_P003081	DMGDH	dimethylglycine dehydrogenase, mitochondrial-like	-2.07387	0.00117656
A_01_P012554	LOC735307	chorionic somatomammotropin-1	-2.07489	0.000708612
A_01_P009678	CRAMP1L	Crm, cramped-like (Drosophila)	-2.07591	0.00259884
A_01_P000635	KDM4C	lysine (K)-specific demethylase 4C	-2.07731	0.00203363
A_01_P015005	WDR70	WD repeat domain 70	-2.07822	0.00324526
A_01_P009127	SYNE1	spectrin repeat containing, nuclear envelope 1	-2.07898	0.000167679
A_01_P014303	ZNF642	zinc finger protein 642	-2.08122	0.000963397
A_01_P011297	LOC100423671	hypothetical LOC100423671	-2.08258	0.000469179
A_01_P002239	PLCG2	phospholipase C, gamma 2 (phosphatidylinositol-specific)	-2.08306	0.00430671
A_01_P013310	WDR41	WD repeat domain 41	-2.0839	0.00116913
A_01_P016111	FBXO22	F-box protein 22	-2.08403	0.000469179
A_01_P001553	PNPLA4	patatin-like phospholipase domain containing 4	-2.08446	0.00299505
A_01_P020040	LOC719492	hypothetical LOC719492	-2.08568	0.00692994
A_01_P011251	LOC708802	e3 ubiquitin-protein ligase RFWD2-like	-2.08669	0.00950168
A_01_P015566	NETO2	neuropilin (NRP) and tolloid (TLL)-like 2	-2.0879	0.00180616
A_01_P016335	STK31	serine/threonine kinase 31	-2.08839	0.000356073
A_01_P002646	LOC718915	tubby-related protein 2-like	-2.08901	0.000411592
A_01_P019308	PLXNC1	plexin C1	-2.08926	0.00853315
A_01_P004346	PRDM10	PR domain containing 10	-2.09006	0.00159962
A_01_P012668	LRP11	low density lipoprotein receptor-related protein 11	-2.09025	0.00055637
A_01_P007123	CHM	choroideremia (Rab escort protein 1)	-2.09115	0.00287027
A_01_P002628	LOC711459	probable G-protein coupled receptor 114-like	-2.09216	0.00096927
A_01_P009068	ADAM21	ADAM metallopeptidase domain 21	-2.09267	0.00203852
A_01_P016576	MOSPD2	motile sperm domain containing 2	-2.09346	0.00234163
A_01_P015900	MS4A7	membrane-spanning 4-domains, subfamily A, member 7	-2.09377	0.00411926
A_01_P019872	DCAF6	DDB1 and CUL4 associated factor 6	-2.0943	0.00115618
A_01_P002930	C5H4orf27	chromosome 4 open reading frame 27 ortholog	-2.09462	0.00182437
A_01_P018626	SIDT1	SID1 transmembrane family, member 1	-2.0947	0.00649318
A_01_P019442	ZNF470	zinc finger protein 470	-2.09477	0.00998245
A_01_P008501	STK31	serine/threonine kinase 31	-2.09485	0.00337106
A_01_P011240	TRIM27	tripartite motif containing 27	-2.09503	0.00031528
A_01_P003567	MED14	mediator complex subunit 14	-2.09588	0.00807824
A_01_P017757	ZNF135	zinc finger protein 135	-2.09671	0.00279473
A_01_P011487	ZNF526	zinc finger protein 526	-2.0974	0.000194341
A_01_P014902	NT5C2	5'-nucleotidase, cytosolic II	-2.09762	0.00138767
A_01_P015660	LOC711494	PAB-dependent poly(A)-specific ribonuclease subunit 3-like	-2.09923	0.00124416
A_01_P005817	MBNL3	muscleblind-like protein 3-like	-2.10103	0.00250255
A_01_P012232	ABCB10	ATP-binding cassette, sub-family B (MDR/TAP), member 10	-2.10161	0.00816135
A_01_P012475	CHFR	checkpoint with forkhead and ring finger domains	-2.10262	0.00821253
A_01_P012839	LOC714040	protein Njmu-R1-like	-2.10347	0.00174044
A_01_P003298	MAN1A2	mannosidase, alpha, class 1A, member 2	-2.10388	0.0087963
A_01_P011091	PEX11B	peroxisomal biogenesis factor 11 beta	-2.10542	0.00932673
A_01_P013851	LOC713567	protein FAM13B-like	-2.10767	0.000808241
A_01_P005471	C15H9orf3	chromosome 9 open reading frame 3 ortholog	-2.10879	0.00588676
A_01_P000030	LRIG1	leucine-rich repeats and immunoglobulin-like domains 1	-2.10958	0.00224165
A_01_P006600	C7H14orf101	chromosome 14 open reading frame 101 ortholog	-2.11046	0.00290233
A_01_P005096	SYNE1	spectrin repeat containing, nuclear envelope 1	-2.1108	0.000159113
A_01_P016765	BBS9	Bardet-Biedl syndrome 9	-2.11264	0.000321862
A_01_P012894	LOC705570	fibronectin type-III domain-containing protein 3A-like	-2.11267	0.00182115
A_01_P007268	SLC45A3	solute carrier family 45 member 3-like	-2.11272	0.000958013
A_01_P009953	HERC1	hect domain and RCC1 (CHC1)-like domain (RLD) 1	-2.11302	0.00652448
A_01_P011669	LCTL	lactase-like	-2.11322	0.00131149
A_01_P008782	LOC703728	zinc finger protein 187-like	-2.11417	0.000562424
A_01_P018476	DNMT3B	DNA (cytosine-5-)-methyltransferase 3 beta	-2.11454	0.00433583
A_01_P004660	ZNF160	zinc finger protein 160	-2.11464	0.000498718
A_01_P003293	LOC717370	transcriptional repressor protein YY1-like	-2.11471	0.000577271
A_01_P012189	ZNF780A	zinc finger protein 780A	-2.11527	8.16643e-05
A_01_P006609	KLHL6	kelch-like 6 (Drosophila)	-2.11529	0.00688343
A_01_P000445	PTPN11	protein tyrosine phosphatase, non-receptor type 11	-2.11719	0.00364086
A_01_P011293	LOC718705	interferon regulatory factor 2-binding protein 2-like	-2.11732	0.000719483
A_01_P011623	MKL2	MKL/myocardin-like 2	-2.1174	0.000646071
A_01_P005709	ATP11B	ATPase, class VI, type 11B	-2.11808	0.00781343
A_01_P008403	MRPS28	mitochondrial ribosomal protein S28	-2.11851	0.00195555
A_01_P006387	BLM	Bloom syndrome, RecQ helicase-like	-2.11995	0.00180887
A_01_P003702	LOC715297	vesicle-fusing ATPase-like	-2.12062	0.0081785
A_01_P016359	ZNF347	zinc finger protein 347	-2.12205	0.00344159
A_01_P011815	ZNF827	zinc finger protein 827	-2.12286	0.00456273
A_01_P011097	CHRNA5	cholinergic receptor, nicotinic, alpha 5	-2.123	0.00390873
A_01_P004055	CCDC79	coiled-coil domain containing 79	-2.12307	0.00409671
A_01_P006267	RPS6KA5	ribosomal protein S6 kinase, 90kDa, polypeptide 5	-2.12563	0.000446267
A_01_P001161	PHF20	PHD finger protein 20	-2.12592	0.00290233
A_01_P010765	ZNF146	zinc finger protein 146	-2.12903	0.0038977
A_01_P005748	MRPS6	mitochondrial ribosomal protein S6 (MRPS6)	-2.12974	0.00471217
A_01_P014735	TGFBRAP1	transforming growth factor, beta receptor associated protein 1	-2.13204	0.00118818
A_01_P011538	LOC714615	ganglioside-induced differentiation-associated protein 2-like	-2.13311	0.00403282
A_01_P019213	LOC696761	transmembrane protein 131-like	-2.13438	0.00518211
A_01_P010505	GSTO2	glutathione S-transferase omega 2	-2.13536	8.09697e-05
A_01_P016987	HK1	hexokinase 1	-2.13726	0.00303769
A_01_P016438	BCDIN3D	BCDIN3 domain containing	-2.13755	0.00197027
A_01_P006616	C7H14orf101	chromosome 14 open reading frame 101 ortholog	-2.1378	0.00743386
A_01_P006386	SECISBP2	SECIS binding protein 2	-2.13896	0.00263732
A_01_P008550	ESYT2	extended synaptotagmin-like protein 2	-2.14003	0.000416698
A_01_P009964	TLR9	toll-like receptor 9	-2.1405	0.000326311
A_01_P003813	HMHA1	histocompatibility (minor) HA-1	-2.1408	0.00313315
A_01_P019753	TMOD4	tropomodulin 4 (muscle)	-2.14086	0.000291341
A_01_P014959	SLC29A3	solute carrier family 29 (nucleoside transporters), member 3	-2.14144	0.000568997
A_01_P008064	PDHX	pyruvate dehydrogenase complex, component X	-2.14448	0.00469036
A_01_P007406	LMAN2L	lectin, mannose-binding 2-like	-2.14598	0.000634875
A_01_P017540	VSIG1	V-set and immunoglobulin domain containing 1	-2.14662	0.00849018
A_01_P007998	SUFU	suppressor of fused homolog (Drosophila)	-2.14687	0.00430274
A_01_P002939	ZDHHC15	zinc finger, DHHC-type containing 15	-2.14695	0.000786015
A_01_P017919	NICN1	nicolin 1	-2.14876	0.000393435
A_01_P013717	LOC695067	uncharacterized protein C9orf68-like	-2.14897	0.00136852
A_01_P003850	LOC722170	atlastin-3-like	-2.15042	0.00551764
A_01_P011518	SLTM	SAFB-like, transcription modulator	-2.15151	0.00168056
A_01_P006810	LOC699780	thyroid hormone receptor alpha-like	-2.1521	0.0014519
A_01_P001817	LOC709140	poly [ADP-ribose] polymerase 16-like	-2.15267	0.00344159
A_01_P015809	C6orf192	chromosome 6 open reading frame 192	-2.15277	0.00849018
A_01_P008023	KCNJ14	potassium inwardly-rectifying channel, subfamily J, member 14	-2.15286	0.00375652
A_01_P001779	LOC716157	syntaxin-6-like	-2.15665	0.00326514
A_01_P015161	LOC702401	protocadherin Fat 4-like	-2.15898	0.00565892
A_01_P002647	PDGFD	platelet derived growth factor D	-2.16042	0.00078439
A_01_P015082	CCDC11	coiled-coil domain containing 11	-2.16077	0.00400407
A_01_P012855	CBFB	core-binding factor, beta subunit	-2.16079	0.00514029
A_01_P011069	FAM113A	family with sequence similarity 113, member A	-2.1616	0.000311114
A_01_P000094	USP13	ubiquitin specific peptidase 13 (isopeptidase T-3)	-2.16175	0.00742314
A_01_P018710	TRAPPC6B	trafficking protein particle complex 6B	-2.16188	0.000562349
A_01_P008420	VAV2	vav 2 guanine nucleotide exchange factor	-2.16271	0.00102978
A_01_P009328	LRPPRC	leucine-rich PPR-motif containing	-2.1631	0.00103939
A_01_P014059	AMBRA1	autophagy/beclin-1 regulator 1	-2.16489	0.00702716
A_01_P004545	LOC716342	hypothetical LOC716342	-2.16516	0.000590952
A_01_P011674	DARS2	aspartyl-tRNA synthetase 2, mitochondrial	-2.16577	0.00457307
A_01_P005629	PRDM2	PR domain containing 2, with ZNF domain	-2.16612	0.00573953
A_01_P013956	WNT3	wingless-type MMTV integration site family, member 3	-2.16679	0.0055645
A_01_P011002	DISP1	dispatched homolog 1 (Drosophila)	-2.16797	0.00602029
A_01_P011377	PHACTR4	phosphatase and actin regulator 4	-2.16826	0.00298857
A_01_P011658	SEC22C	SEC22 vesicle trafficking protein homolog C (S. cerevisiae)	-2.16827	0.00419682
A_01_P006760	LOC703842	UPF0670 protein C8orf55-like	-2.16843	0.00182654
A_01_P014749	HAS3	hyaluronan synthase 3	-2.16913	0.00860869
A_01_P017484	LOC717391	zinc finger protein ZXDC-like	-2.16939	0.00118368
A_01_P009890	KLHL8	kelch-like 8 (Drosophila)	-2.17076	0.00437165
A_01_P000273	PDE3B	phosphodiesterase 3B, cGMP-inhibited	-2.17336	0.00237144
A_01_P004984	LPGAT1	lysophosphatidylglycerol acyltransferase 1	-2.17474	0.00351506
A_01_P012428	TTC15	tetratricopeptide repeat domain 15	-2.17642	0.00282849
A_01_P014667	C14orf153	apoptogenic 1	-2.1801	0.00198433
A_01_P017305	HSPA4	heat shock 70kDa protein 4	-2.18146	0.000367771
A_01_P003294	LOC717370	transcriptional repressor protein YY1-like	-2.18237	0.00110925
A_01_P013818	SVOPL	SVOP-like	-2.18426	0.0072082
A_01_P007014	TDO2	tryptophan 2,3-dioxygenase-like	-2.18794	0.00101135
A_01_P004796	YEATS2	YEATS domain containing 2	-2.18796	0.000577298
A_01_P011968	MOGS	mannosyl-oligosaccharide glucosidase	-2.18811	0.00964059
A_01_P018569	LOC722848	ADP-ribosyl cyclase 2-like	-2.1882	0.00140575
A_01_P000825	CRIM1	cysteine rich transmembrane BMP regulator 1 (chordin-like)	-2.1884	0.00742314
A_01_P012443	ACRC	acidic repeat containing	-2.18974	0.00795388
A_01_P014193	LOC719673	SH3 and multiple ankyrin repeat domains protein 1-like	-2.19055	0.000335232
A_01_P009572	ARHGEF7	Rho guanine nucleotide exchange factor (GEF) 7	-2.19403	0.00557522
A_01_P002000	TNFAIP8L3	tumor necrosis factor, alpha-induced protein 8-like 3	-2.19484	0.00523297
A_01_P019114	C15H9orf41	chromosome 9 open reading frame 41 ortholog	-2.19557	0.000960946
A_01_P004524	FBXO32	F-box protein 32	-2.19618	0.00152995
A_01_P002257	NAV2	neuron navigator 2	-2.19633	0.00469464
A_01_P012770	ACAD10	acyl-CoA dehydrogenase family, member 10	-2.19671	0.00379732
A_01_P019851	SETX	senataxin	-2.19836	0.0055243
A_01_P000748	FBXO32	F-box protein 32	-2.19872	0.00249517
A_01_P009966	LOC715532	kiSS-1 receptor-like	-2.20072	0.00177386
A_01_P017306	C9orf91	chromosome 9 open reading frame 91	-2.20183	0.000621582
A_01_P019988	MLL3	myeloid/lymphoid or mixed-lineage leukemia 3	-2.20246	0.000801052
A_01_P009430	LOC702401	protocadherin Fat 4-like	-2.20451	0.00198919
A_01_P002626	SP140	SP140 nuclear body protein	-2.20466	0.00176937
A_01_P013513	MAP1A	microtubule-associated protein 1A	-2.20502	0.00480299
A_01_P018090	MAML2	mastermind-like 2 (Drosophila)	-2.20504	0.00128176
A_01_P008822	LOC697625	LOC697625 hypothetical	-2.20511	0.00409671
A_01_P016039	NAE1	NEDD8 activating enzyme E1 subunit 1	-2.20756	0.000362452
A_01_P012318	NPHP3	nephronophthisis 3 (adolescent)	-2.20783	0.0016627
A_01_P015410	ATP6V0A4	ATPase, H+ transporting, lysosomal V0 subunit a4	-2.20912	0.0080786
A_01_P001320	PHF6	PHD finger protein 6	-2.21076	0.00799262
A_01_P012810	LOC700539	igGFc-binding protein-like	-2.21468	0.00500255
A_01_P003625	MAP3K4	mitogen-activated protein kinase kinase kinase 4	-2.21483	0.00110111
A_01_P014409	LOC717072	tripartite motif-containing protein 44-like	-2.2163	0.00350486
A_01_P001130	SERTAD2	SERTA domain containing 2	-2.21637	0.00149857
A_01_P006095	DNAJA3	dnaJ homolog subfamily A member 3, mitochondrial-like	-2.21647	0.000475397
A_01_P005194	LOC722000	tristetraproline-like	-2.21674	0.0032607
A_01_P016990	RAP1GDS1	RAP1, GTP-GDP dissociation stimulator 1	-2.21722	0.00533291
A_01_P004130	NUP210	nucleoporin 210kDa	-2.22023	0.00701074
A_01_P011335	CLYBL	citrate lyase beta like	-2.22232	0.000843916
A_01_P012965	H2AFY	H2A histone family, member Y	-2.22365	0.00501541
A_01_P010224	ZNF41	zinc finger protein 41	-2.2242	0.000309438
A_01_P013226	EP300	E1A binding protein p300	-2.22427	0.00282488
A_01_P020026	STK10	serine/threonine kinase 10	-2.22479	0.00270637
A_01_P005300	LOC694431	WD repeat-containing protein C2orf86-like	-2.22528	0.000475758
A_01_P002703	LOC708735	muscleblind-like protein 1-like	-2.22536	0.00232974
A_01_P005742	PRSS2	protease, serine, 2 (trypsin 2)	-2.22563	0.0040451
A_01_P002667	ANAPC4	anaphase promoting complex subunit 4	-2.22641	0.00363384
A_01_P008973	LOC711835	autophagy-related protein 10-like	-2.22645	0.00246933
A_01_P003614	SLC38A9	solute carrier family 38, member 9	-2.22702	0.00344879
A_01_P009938	EZH1	enhancer of zeste homolog 1 (Drosophila)	-2.22737	0.00239989
A_01_P000858	FAF1	Fas (TNFRSF6) associated factor 1	-2.23088	0.00650774
A_01_P014554	LOC712931	neuronal-specific septin-3-like	-2.23118	7.78317e-05
A_01_P009857	LOC701932	leucine-rich repeat neuronal protein 3-like	-2.23265	0.00278026
A_01_P002361	MARK3	MAP/microtubule affinity-regulating kinase 3-like	-2.23417	0.00389512
A_01_P009842	ATP6V1H	v-type proton ATPase subunit H-like	-2.23472	0.00171406
A_01_P007351	TGFBR1	transforming growth factor, beta receptor 1	-2.23539	0.000210899
A_01_P014232	ANKFY1	ankyrin repeat and FYVE domain containing 1	-2.23577	0.00130784
A_01_P016455	ANAPC1	anaphase promoting complex subunit 1	-2.23579	0.00250924
A_01_P008259	DHCR24	24-dehydrocholesterol reductase-like	-2.23624	0.000384597
A_01_P001969	HEATR3	HEAT repeat containing 3	-2.23724	0.000555258
A_01_P001563	HAGH	hydroxyacylglutathione hydrolase	-2.23922	0.00114848
A_01_P018388	TSHZ2	teashirt zinc finger homeobox 2	-2.24081	0.00468954
A_01_P000477	LOC709632	tumor necrosis factor alpha-induced protein 8-like protein 2-like	-2.24356	0.00756222
A_01_P012217	LOC694910	ubiquitin-conjugating enzyme E2C-binding protein-like	-2.2441	0.000875448
A_01_P017792	NF1	neurofibromin 1	-2.24482	0.000521359
A_01_P002534	ATRX	alpha thalassemia/mental retardation syndrome X-linked	-2.24664	0.0014854
A_01_P005181	LOC709352	multiple epidermal growth factor-like domains protein 8-like	-2.24721	0.000646071
A_01_P014067	PPP6R2	protein phosphatase 6, regulatory subunit 2	-2.24763	0.00144393
A_01_P018095	C1RL	complement component 1, r subcomponent-like	-2.24766	0.00660158
A_01_P001307	OR4E2	olfactory receptor, family 4, subfamily E, member 2	-2.24814	0.00156218
A_01_P007936	STARD13	StAR-related lipid transfer (START) domain containing 13	-2.24841	0.00177038
A_01_P018256	PRPF8	PRP8 pre-mRNA processing factor 8 homolog (S. cerevisiae)	-2.24857	0.00103921
A_01_P017238	C6orf57	chromosome 6 open reading frame 57	-2.25021	0.000776237
A_01_P005530	HEXIM2	hexamethylene bis-acetamide inducible 2	-2.25181	0.000675663
A_01_P004569	PPM1B	protein phosphatase, Mg2+/Mn2+ dependent, 1B	-2.2551	0.00122929
A_01_P010270	PPFIBP2	PTPRF interacting protein, binding protein 2 (liprin beta 2)	-2.25545	0.00040503
A_01_P019248	LOC716418	acyl-CoA-binding domain-containing protein 6-like	-2.25705	0.00211662
A_01_P019423	TTC27	tetratricopeptide repeat domain 27	-2.25765	0.00236676
A_01_P006611	CEP19	centrosomal protein 19kDa	-2.25864	0.00177386
A_01_P013497	LOC719682	tubulin-specific chaperone D-like	-2.2588	0.00481489
A_01_P008666	LOC721291	telomerase-binding protein EST1A-like	-2.25964	0.00258308
A_01_P017467	TAOK3	TAO kinase 3	-2.26243	0.00277701
A_01_P013999	POUF2AF1	POU class 2 associating factor 1	-2.26276	0.00234339
A_01_P013615	USP45	ubiquitin specific peptidase 45	-2.26329	0.00027543
A_01_P014618	LOC695905	similar to transposon-derived Buster3 transposase-like	-2.264	0.000885577
A_01_P005480	RNF125	ring finger protein 125	-2.26558	0.00891306
A_01_P008034	CDK13	cyclin-dependent kinase 13	-2.26584	0.0048435
A_01_P009959	TRIM6	tripartite motif containing 6	-2.26619	0.00587859
A_01_P017813	EPB41	Erythrocyte Membrane Protein protein 4.1-like	-2.26996	0.00430877
A_01_P014938	SEPT6	septin 6	-2.27223	0.00511765
A_01_P013060	VPS41	vacuolar protein sorting 41 homolog (S. cerevisiae)	-2.27369	0.000243474
A_01_P001994	C3orf26	chromosome 3 open reading frame 26	-2.2749	0.000510442
A_01_P018874	RBL2	retinoblastoma-like 2 (p130)	-2.27629	0.000227002
A_01_P012410	CHST6	carbohydrate (N-acetylglucosamine 6-O) sulfotransferase 6	-2.27734	0.000562349
A_01_P013164	LOC715354	FAM65B-like	-2.27803	0.0037187
A_01_P003757	PBXIP1	pre-B-cell leukemia homeobox interacting protein 1	-2.27815	0.00743529
A_01_P001571	LPHN1	latrophilin-1-like	-2.27853	0.00590846
A_01_P019189	SCAMP1	secretory carrier membrane protein 1	-2.27867	0.0073161
A_01_P001059	ZNF268	zinc finger protein 268-like	-2.27921	0.00131724
A_01_P012794	OIP5	Opa interacting protein 5	-2.27923	0.00252042
A_01_P016389	LOC698265	putative uncharacterized protein CXorf58-like	-2.27942	0.00122055
A_01_P008996	TRAF3IP3	TRAF3 interacting protein 3	-2.27961	0.00256721
A_01_P014889	ZC3H13	zinc finger CCCH-type containing 13	-2.28038	0.00205334
A_01_P007963	C15H9orf5	chromosome 9 open reading frame 5 homolog	-2.28071	0.0033636
A_01_P002776	DPPA2	developmental pluripotency associated 2	-2.2813	0.00312391
A_01_P017052	LOC719582	GPI mannosyltransferase 1-like	-2.28148	0.000884281
A_01_P012083	LOC718295	coiled-coil domain-containing protein 25-like	-2.28203	0.000227679
A_01_P003425	DAG1	dystroglycan 1 (dystrophin-associated glycoprotein 1)	-2.28324	0.00444514
A_01_P017937	PTPN22	protein tyrosine phosphatase, non-receptor type 22 (lymphoid)	-2.28374	0.00144465
A_01_P005763	ARHGAP15	Rho GTPase activating protein 15	-2.28381	0.00671148
A_01_P017229	TMEM30A	transmembrane protein 30A	-2.28399	0.00218189
A_01_P007765	LOC711518	kazal-type serine protease inhibitor domain-containing protein 1-like	-2.28446	0.000763545
A_01_P017187	SLC2A11	solute carrier family 2 (facilitated glucose transporter), member 11	-2.28477	0.000662454
A_01_P001048	LOC704061	dedicator of cytokinesis protein 2-like	-2.28519	0.00503796
A_01_P005528	SND1	staphylococcal nuclease and tudor domain containing 1	-2.28766	0.00108296
A_01_P020008	BBS10	Bardet-Biedl syndrome 10	-2.28815	0.00789284
A_01_P012465	METTL3	methyltransferase like 3	-2.2887	0.000354281
A_01_P018385	LOC715354	FAM65B-like	-2.28897	0.00342559
A_01_P001085	BIRC3	baculoviral IAP repeat containing 3	-2.29123	0.00665331
A_01_P005015	RPAIN	RPA interacting protein	-2.29177	0.000568378
A_01_P008609	LOC712984	poly(A)-specific ribonuclease PARN-like	-2.29246	0.00405016
A_01_P008689	ZNF132	zinc finger protein 132	-2.29252	0.00375652
A_01_P014659	ERMP1	endoplasmic reticulum metallopeptidase 1	-2.29508	0.00554031
A_01_P012831	SENP8	SUMO/sentrin specific peptidase family member 8	-2.29557	0.000618836
A_01_P009467	VCPIP1	valosin containing protein (p97)/p47 complex interacting protein 1	-2.29892	0.00391208
A_01_P016552	LOC710992	protein FAM193A-like	-2.30032	0.00268963
A_01_P001548	FRYL	FRY-like	-2.30039	0.0047689
A_01_P020001	ZNF280D	zinc finger protein 280D	-2.30063	0.0052552
A_01_P012715	LOC719938	DNA-directed RNA polymerase I subunit RPA2-like	-2.30206	0.00131724
A_01_P013672	ZNF182	zinc finger protein 182	-2.30417	0.00246933
A_01_P011524	PAK3	p21 protein (Cdc42/Rac)-activated kinase 3	-2.30481	0.0027882
A_01_P011434	VEZF1	vascular endothelial zinc finger 1	-2.30483	0.00491383
A_01_P019653	DOCK9	dedicator of cytokinesis 9	-2.30687	0.00694438
A_01_P002203	DRD5	dopamine receptor D5	-2.30692	0.00266159
A_01_P005769	MYCN	v-myc myelocytomatosis viral related oncogene, neuroblastoma derived (avian)	-2.30876	0.00311266
A_01_P007068	LOC709083	protein AF-10-like	-2.31214	0.00298164
A_01_P005085	LOC714408	AF4/FMR2 family member 3-like	-2.31242	0.000290037
A_01_P007870	LOC697570	putative uncharacterized protein C9orf164-like	-2.31254	0.00068002
A_01_P009914	LOC698955	protein FAM122A-like	-2.31263	8.45138e-05
A_01_P011705	LOC718628	syntaxin-2-like	-2.31311	0.00337897
A_01_P001198	TMEM39A	transmembrane protein 39A	-2.31337	6.63295e-05
A_01_P013967	ARL15	ADP-ribosylation factor-like 15	-2.31563	0.00167657
A_01_P000584	DIRAS2	DIRAS family, GTP-binding RAS-like 2	-2.31639	0.00063887
A_01_P013894	SLC46A3	solute carrier family 46, member 3	-2.31647	0.000622185
A_01_P002057	LOC708827	peptidyl-prolyl cis-trans isomerase FKBP9-like	-2.3179	0.0050239
A_01_P000366	PDZK1	PDZ domain containing 1	-2.31903	0.00284285
A_01_P012529	ZNF193	zinc finger protein 193	-2.31942	0.00630944
A_01_P007278	RAPGEF1	Rap guanine nucleotide exchange factor (GEF) 1	-2.32062	0.00163665
A_01_P006379	LOC699373	peroxisomal membrane protein PEX14-like	-2.3217	0.0069069
A_01_P008297	C17orf63	chromosome 17 open reading frame 63	-2.32411	0.00364453
A_01_P011828	RANBP6	RAN binding protein 6	-2.32522	0.000451866
A_01_P006346	GSTA4	glutathione S-transferase alpha 4	-2.326	0.00307502
A_01_P014248	SMC1A	structural maintenance of chromosomes 1A	-2.3262	0.000760581
A_01_P017130	RNF19A	ring finger protein 19A	-2.32696	0.00313687
A_01_P019863	LOC100424541	olfactory receptor 2M4-like	-2.32888	0.00194498
A_01_P008453	ZNF498	zinc finger protein 498	-2.33082	0.000200454
A_01_P003639	PHACTR4	phosphatase and actin regulator 4	-2.3311	0.00121853
A_01_P012902	SLC39A2	solute carrier family 39 (zinc transporter), member 2	-2.33206	0.000964228
A_01_P008687	C20orf132	chromosome 20 open reading frame 132	-2.33351	0.00744041
A_01_P004539	TAF9	RNA polymerase II, TATA box binding protein (TBP)-associated factor	-2.33619	0.00419682
A_01_P019831	PAG1	phosphoprotein associated with glycosphingolipid microdomains 1	-2.33621	0.00293996
A_01_P008233	SMYD3	SET and MYND domain containing 3	-2.33651	0.00141036
A_01_P000915	LOC716978	calcineurin-like phosphoesterase domain-containing protein 1-like	-2.33753	0.00148527
A_01_P016662	LOC701131	calcium-binding atopy-related autoantigen 1-like	-2.33803	0.00336412
A_01_P009262	LOC711416	serine/threonine-protein kinase TAO1-like	-2.33822	0.00145357
A_01_P015692	ZNF546	zinc finger protein 546	-2.34032	0.00165024
A_01_P017225	FMO4	flavin containing monooxygenase 4	-2.34369	0.000475758
A_01_P004000	TSEN2	tRNA splicing endonuclease 2 homolog (S. cerevisiae)	-2.34404	0.000675663
A_01_P015336	LOC713468	zinc finger protein 420-like	-2.34503	0.00727464
A_01_P010796	DLG5	discs, large homolog 5 (Drosophila)	-2.34971	0.00904611
A_01_P006018	CDYL	chromodomain protein, Y-like	-2.35052	0.00661211
A_01_P002731	USP34	ubiquitin specific peptidase 34	-2.3506	0.00360748
A_01_P013791	KIAA0232	KIAA0232	-2.3518	0.00710804
A_01_P015611	CD180	CD180 antigen-like	-2.35268	0.00411071
A_01_P018353	PATZ1	POZ (BTB) and AT hook containing zinc finger 1	-2.35292	0.000478255
A_01_P007928	FOXP1	forkhead box P1	-2.35511	0.00743614
A_01_P004858	PPP1R12B	protein phosphatase 1, regulatory (inhibitor) subunit 12B	-2.35662	0.000388781
A_01_P007096	LOC716857	ubiquitin carboxyl-terminal hydrolase 32-like	-2.35778	0.00600038
A_01_P005815	ADARB1	adenosine deaminase, RNA-specific, B1	-2.3621	0.00944398
A_01_P005768	GIT2	G protein-coupled receptor kinase interacting ArfGAP 2	-2.36447	0.00113181
A_01_P010607	AARS	alanyl-tRNA synthetase, cytoplasmic-like	-2.36504	0.000105102
A_01_P000411	PAG1	phosphoprotein associated with glycosphingolipid microdomains 1	-2.36605	0.0040853
A_01_P002434	SKAP2	src kinase associated phosphoprotein 2	-2.36698	0.000505573
A_01_P006043	TRIM37	tripartite motif containing 37	-2.36777	0.00372449
A_01_P019856	LOC711689	43 kDa receptor-associated protein of the synapse-like	-2.37027	0.00252882
A_01_P008751	RAPGEF2	Rap guanine nucleotide exchange factor (GEF) 2	-2.37214	0.00801802
A_01_P017723	DSEL	dermatan sulfate epimerase-like	-2.37679	0.00815699
A_01_P000692	MECR	mitochondrial trans-2-enoyl-CoA reductase	-2.3783	0.000776237
A_01_P005857	MARK3	MAP/microtubule affinity-regulating kinase 3-like	-2.37898	0.009333
A_01_P009388	LOC710120	serine/threonine-protein phosphatase 6 regulatory subunit 3-like	-2.37938	0.0024307
A_01_P018741	CXCR7	chemokine (C-X-C motif) receptor 7	-2.38021	0.000784743
A_01_P006087	PUS10	pseudouridylate synthase 10	-2.38094	0.00016971
A_01_P008977	TDRD6	tudor domain containing 6	-2.38141	0.00165953
A_01_P005084	AGA	aspartylglucosaminidase	-2.38493	0.000158241
A_01_P020049	LOC717360	calcium-activated potassium channel subunit beta-4-like	-2.38793	0.0055645
A_01_P016641	TRIM46	tripartite motif containing 46	-2.39014	0.00593121
A_01_P007742	FYCO1	FYVE and coiled-coil domain containing 1	-2.39041	0.00738881
A_01_P001561	LOC713917	ephexin-1-like	-2.39377	0.00674129
A_01_P002037	LOC716520	probable G-protein coupled receptor 88-like	-2.39549	0.000898382
A_01_P001446	TRAPPC10	trafficking protein particle complex 10	-2.39555	0.00143356
A_01_P005844	ZNF646	zinc finger protein 646	-2.39581	0.00313315
A_01_P008739	FBXO22	F-box protein 22	-2.39642	0.000216718
A_01_P011920	LOC698063	uncharacterized protein KIAA1467-like	-2.39648	0.00205283
A_01_P015237	MLYCD	malonyl-CoA decarboxylase	-2.39818	0.00182425
A_01_P012687	PFKFB1	6-phosphofructo-2-kinase/fructose-2,6-biphosphatase 1	-2.39818	0.00666605
A_01_P007139	LOC708043	UPF0546 membrane protein C1orf91-like	-2.39983	0.00638638
A_01_P005485	LOC693875	cofilin-2-like	-2.40125	0.00384098
A_01_P009286	PFN4	profilin family, member 4	-2.40235	0.0042053
A_01_P007504	PDCD6IP	programmed cell death 6 interacting protein	-2.40249	0.00183893
A_01_P014713	REEP3	receptor accessory protein 3	-2.40348	0.000447134
A_01_P011729	FIG4	FIG4 homolog, SAC1 lipid phosphatase domain containing (S. cerevisiae)	-2.40446	0.000855517
A_01_P002149	ASB1	ankyrin repeat and SOCS box-containing 1	-2.40495	8.09697e-05
A_01_P011043	NFS1	NFS1 nitrogen fixation 1 homolog (S. cerevisiae)	-2.40512	0.000492314
A_01_P002625	LOC717185	rRNA methyltransferase 1, mitochondrial-like	-2.4057	0.000562349
A_01_P002379	ZHX1	zinc fingers and homeoboxes 1	-2.40648	0.00553715
A_01_P016586	DSTYK	dual serine/threonine and tyrosine protein kinase	-2.40704	0.00153448
A_01_P010334	ALS2CL	ALS2 C-terminal like	-2.40986	0.0083987
A_01_P001301	ATM	ataxia telangiectasia mutated	-2.40989	0.00146979
A_01_P006980	LOC704723	ras suppressor protein 1-like	-2.41022	0.00248018
A_01_P007424	MLL3	myeloid/lymphoid or mixed-lineage leukemia 3	-2.4107	0.009985
A_01_P017207	ZFP64	zinc finger protein 64 homolog (mouse)	-2.41134	0.000271456
A_01_P010056	IARS	isoleucyl-tRNA synthetase	-2.41144	0.000696057
A_01_P005928	PLAG1	pleiomorphic adenoma gene 1	-2.41298	0.00438601
A_01_P003537	ADRBK2	adrenergic, beta, receptor kinase 2	-2.41382	0.000741436
A_01_P000738	ENPP5	ectonucleotide pyrophosphatase/phosphodiesterase 5 (putative)	-2.41752	0.00687192
A_01_P017109	MAN1C1	mannosidase, alpha, class 1C, member 1	-2.41841	0.00270637
A_01_P006526	ACVR1B	activin A receptor, type IB	-2.41931	0.00688343
A_01_P003714	NEB	nebulin	-2.42075	0.00152795
A_01_P016145	GSG2	germ cell associated 2 (haspin)	-2.42132	0.00361409
A_01_P010089	LOC713530	modulator of retrovirus infection homolog	-2.42236	0.00218189
A_01_P017107	BAG5	BCL2-associated athanogene 5	-2.42623	0.000763545
A_01_P000343	ZNF540	zinc finger protein 540	-2.42676	0.00543209
A_01_P019621	BAIAP3	BAI1-associated protein 3	-2.4274	0.000892889
A_01_P013941	GLS	glutaminase	-2.42818	0.000562349
A_01_P018322	THAP5	THAP domain containing 5	-2.42849	0.00118719
A_01_P006923	CDCA3	cell division cycle associated 3	-2.42971	0.000290037
A_01_P003670	BIRC6	baculoviral IAP repeat-containing protein 6-like	-2.42974	0.000985773
A_01_P015966	TRMT2B	TRM2 tRNA methyltransferase 2 homolog B (S. cerevisiae)	-2.43073	0.000133352
A_01_P016826	LOC715576	KH homology domain-containing protein 1-like	-2.43119	0.000471039
A_01_P009506	ATP11C	ATPase, class VI, type 11C	-2.43141	0.00197837
A_01_P008102	FRMD7	FERM domain containing 7	-2.43304	0.00256146
A_01_P011532	SOCS5	suppressor of cytokine signaling 5	-2.43515	0.00379903
A_01_P008769	WIPF1	WAS/WASL interacting protein family, member 1	-2.43533	0.00672951
A_01_P013601	MYCBP2	MYC binding protein 2	-2.438	0.00440247
A_01_P014674	NFATC3	nuclear factor of activated T-cells, cytoplasmic, calcineurin-dependent 3	-2.44125	0.00104062
A_01_P019661	INVS	inversin	-2.44184	0.00910717
A_01_P004398	ADAMTS6	ADAM metallopeptidase with thrombospondin type 1 motif, 6	-2.44336	0.00479709
A_01_P014136	CASD1	CAS1 domain containing 1	-2.44766	0.000819116
A_01_P019622	LOC707982	rhomboid domain-containing protein 1-like	-2.45121	0.000400348
A_01_P012070	NCOA6	nuclear receptor coactivator 6	-2.45221	0.00110111
A_01_P002329	LOC707706	peroxisomal membrane protein 4-like	-2.45361	0.00902581
A_01_P014706	LOC699817	uncharacterized protein C12orf60-like	-2.4544	0.00550706
A_01_P005228	ZNF280B	zinc finger protein 280B	-2.45448	0.00135557
A_01_P017648	SHMT1	serine hydroxymethyltransferase 1 (soluble)	-2.45614	0.00127831
A_01_P008423	DNASE1	deoxyribonuclease I	-2.45662	0.005124
A_01_P020165	ZNF382	zinc finger protein 382	-2.45719	0.000497091
A_01_P003435	ACAP2	ArfGAP with coiled-coil, ankyrin repeat and PH domains 2"	-2.45842	0.00325067
A_01_P017749	LOC700766	UPF0493 protein KIAA1632-like	-2.4587	0.00167905
A_01_P007364	ABCA5	ATP-binding cassette, sub-family A (ABC1), member 5	-2.45896	0.00063887
A_01_P005561	AMMECR1	Alport syndrome, mental retardation, midface hypoplasia and elliptocytosis chromosomal region 1	-2.45957	0.00327959
A_01_P012962	H2AFY	H2A histone family, member Y	-2.46125	0.0032358
A_01_P005559	AMMECR1	Alport syndrome, mental retardation, midface hypoplasia and elliptocytosis chromosomal region 1	-2.46256	0.00350444
A_01_P006422	RFXAP	regulatory factor X-associated protein	-2.46261	0.00262794
A_01_P013831	PMS1	PMS1 postmeiotic segregation increased 1 (S. cerevisiae)	-2.46302	0.00238427
A_01_P006897	LOC722710	zinc finger protein 845-like	-2.46387	0.00112012
A_01_P001031	KLF12	Kruppel-like factor 12	-2.46393	0.00176258
A_01_P016023	ARHGEF6	Rac/Cdc42 guanine nucleotide exchange factor (GEF) 6	-2.46523	0.000578616
A_01_P011961	C5H4orf41	chromosome 4 open reading frame 41 ortholog	-2.46573	0.00728835
A_01_P012496	LOC721789	disco-interacting protein 2 homolog C-like	-2.46721	0.00719248
A_01_P019205	LOC707738	secreted frizzled-related protein 5-like	-2.46757	0.00774266
A_01_P014173	LOC695301	myomesin-1-like	-2.46984	0.000647252
A_01_P017403	ACADSB	acyl-CoA dehydrogenase, short/branched chain	-2.47113	0.000763841
A_01_P011423	LOC711027	peroxisome proliferator-activated receptor gamma coactivator 1-beta-like	-2.47198	0.00506396
A_01_P013115	ZNF638	zinc finger protein 638	-2.47203	0.00477663
A_01_P009013	ACRC	acidic repeat containing	-2.47276	0.00140575
A_01_P018263	MIR155	microRNA	-2.4736	0.00772098
A_01_P005613	COMMD2	COMM domain containing 2	-2.47395	0.00724447
A_01_P012743	CRADD	CASP2 and RIPK1 domain containing adaptor with death domain	-2.47408	0.00424633
A_01_P019578	VPS4B	vacuolar protein sorting 4 homolog B (S. cerevisiae)	-2.4741	0.000636091
A_01_P004047	RBBP9	retinoblastoma binding protein 9	-2.47416	0.00414388
A_01_P017220	INO80	INO80 homolog (S. cerevisiae)	-2.47538	0.0098053
A_01_P003656	ZNF544	zinc finger protein 544	-2.47674	0.00230171
A_01_P012173	THAP6	THAP domain containing 6	-2.47823	0.00308587
A_01_P014410	LPAR5	lysophosphatidic acid receptor 5	-2.47887	0.000447134
A_01_P003050	LOC695685	erythroid differentiation-related factor 1-like	-2.47993	0.00147283
A_01_P015447	IFNAR1	interferon (alpha, beta and omega) receptor 1	-2.48051	0.00726451
A_01_P010099	LOC100431026	hypothetical LOC100431026	-2.48613	0.00508652
A_01_P002745	EFTUD1	elongation factor Tu GTP binding domain containing 1	-2.48632	0.0013129
A_01_P012354	PRKDC	protein kinase, DNA-activated, catalytic polypeptide	-2.48695	0.000829845
A_01_P017745	ARMC8	armadillo repeat containing 8	-2.48917	0.00354228
A_01_P004664	DLG1	discs, large homolog 1 (Drosophila)	-2.4893	0.000861157
A_01_P009026	LOC712230	myosin-7B-like	-2.49008	0.000124058
A_01_P016976	PGBD1	piggyBac transposable element derived 1	-2.49357	0.00539828
A_01_P009810	DMXL1	Dmx-like 1	-2.49377	0.00405016
A_01_P015058	SYNE2	spectrin repeat containing, nuclear envelope 2	-2.49421	0.0080528
A_01_P012451	LOC723748	involucrin-like	-2.49463	0.00220192
A_01_P014973	TMEM79	transmembrane protein 79	-2.49687	0.000285334
A_01_P008159	OGG1	8-oxoguanine DNA glycosylase	-2.49847	0.000583489
A_01_P005495	KLHDC5	kelch domain containing 5	-2.50554	0.000258695
A_01_P017249	PLAT	plasminogen activator, tissue	-2.50693	0.00511297
A_01_P017807	DNER	delta/notch-like EGF repeat containing	-2.50767	0.0015889
A_01_P002682	RASA1	RAS p21 protein activator (GTPase activating protein) 1	-2.50845	0.00294751
A_01_P009802	LOC100424693	vacuolar protein sorting-associated protein 53 homolog	-2.50848	0.00527709
A_01_P019008	TBL1Y	transducin (beta)-like 1, Y-linked	-2.50894	0.00473316
A_01_P010318	ZNF330	zinc finger protein 330	-2.51134	0.000283032
A_01_P009749	SLC5A11	solute carrier family 5 (sodium/glucose cotransporter), member 11	-2.51198	0.00400107
A_01_P001508	SULF2	sulfatase 2	-2.51277	0.00926537
A_01_P008671	SNX9	sorting nexin 9	-2.5133	0.000285592
A_01_P014997	CRAMP1L	Crm, cramped-like (Drosophila)	-2.51488	0.00903824
A_01_P019383	PHIP	pleckstrin homology domain interacting protein	-2.51557	0.00730889
A_01_P004255	PCCA	propionyl CoA carboxylase, alpha polypeptide	-2.51636	0.00165024
A_01_P005958	PEX1	peroxisomal biogenesis factor 1	-2.51642	0.00176446
A_01_P019315	LOC100426960	hypothetical protein LOC100426960	-2.51846	0.00125319
A_01_P015454	LOC712238	zinc finger and BTB domain-containing protein 20-like	-2.52049	0.00450076
A_01_P015341	RARG	retinoic acid receptor, gamma	-2.52068	0.0052255
A_01_P002253	ZNF226	zinc finger protein 226	-2.52104	0.000478255
A_01_P003932	OGG1	8-oxoguanine DNA glycosylase	-2.52116	0.000594052
A_01_P012861	LARP1B	La ribonucleoprotein domain family, member 1B	-2.52151	0.000297218
A_01_P010851	LOC714238	metal transporter CNNM2-like	-2.52266	0.00176217
A_01_P009094	SLC23A1	solute carrier family 23 (nucleobase transporters), member 1	-2.52332	0.00246933
A_01_P014310	LDB2	LIM domain binding 2	-2.52361	0.00516338
A_01_P014028	LOC705915	monoacylglycerol lipase ABHD12-like	-2.52375	0.000631756
A_01_P018454	LOC701463	coiled-coil domain-containing protein 90A, mitochondrial-like	-2.52389	0.000883415
A_01_P019090	SWAP70	SWAP switching B-cell complex 70kDa subunit	-2.52469	0.00611463
A_01_P016690	LOC100427030	bone morphogenetic protein 8B-like	-2.5248	0.0085884
A_01_P004396	AKAP9	A kinase (PRKA) anchor protein (yotiao) 9	-2.52639	0.00472565
A_01_P012463	TET1	tet oncogene 1	-2.52677	0.00674129
A_01_P016235	MAPK8IP2	c-Jun-amino-terminal kinase-interacting protein 2-like	-2.52701	0.000309438
A_01_P010662	AKAP3	A kinase (PRKA) anchor protein 3	-2.52817	0.000930848
A_01_P012617	ASXL2	additional sex combs like 2 (Drosophila)	-2.52825	0.00763383
A_01_P005392	BOK	BCL2-related ovarian killer	-2.52903	0.00389425
A_01_P018268	LOC712918	putative teratocarcinoma-derived growth factor 2-like	-2.53087	0.00454002
A_01_P007410	CATSPER2	cation channel, sperm associated 2	-2.53121	8.16643e-05
A_01_P003286	APC	adenomatosis polyposis coli	-2.53225	0.00419986
A_01_P018005	TRAF5	TNF receptor-associated factor 5	-2.53231	0.00352938
A_01_P006181	UHRF1BP1	UHRF1 binding protein 1	-2.53513	0.00270637
A_01_P001531	LOC712606	RING finger protein 170-like	-2.53527	0.00344159
A_01_P019091	SWAP70	SWAP switching B-cell complex 70kDa subunit	-2.53547	0.00944398
A_01_P003471	MTRF1	mitochondrial translational release factor 1	-2.53999	0.00114272
A_01_P002287	MEOX1	mesenchyme homeobox 1	-2.54026	0.00539466
A_01_P017009	CREBBP	CREB binding protein	-2.54182	0.00334698
A_01_P001681	C7H14orf159	chromosome 14 open reading frame 159 ortholog	-2.54185	0.000784743
A_01_P011890	SCN8A	sodium channel, voltage gated, type VIII, alpha subunit	-2.54458	0.00910295
A_01_P017893	LOC701688	t-lymphoma invasion and metastasis-inducing protein 2-like	-2.5464	0.000248313
A_01_P007156	MAP3K2	mitogen-activated protein kinase kinase kinase 2	-2.5467	0.00572001
A_01_P008567	LOC711026	probable ATP-dependent RNA helicase DDX46-like	-2.54741	0.00102454
A_01_P010625	EIF2C4	eukaryotic translation initiation factor 2C, 4	-2.54965	0.00801802
A_01_P000887	TBL1Y	transducin (beta)-like 1, Y-linked	-2.55078	0.000784743
A_01_P013662	CBX7	chromobox homolog 7	-2.55265	0.00424437
A_01_P004541	ARID2	AT rich interactive domain 2 (ARID, RFX-like)	-2.55383	0.00171064
A_01_P019390	LOC695694	lethal(3)malignant brain tumor-like protein-like	-2.55489	0.00198885
A_01_P017640	ZFYVE16	zinc finger, FYVE domain containing 16	-2.55725	0.0015548
A_01_P017367	WDR4	WD repeat domain 4	-2.55731	0.000354281
A_01_P003912	LACE1	lactation elevated 1	-2.55794	0.00485247
A_01_P001009	KBTBD3	kelch repeat and BTB (POZ) domain containing 3	-2.56278	0.0025845
A_01_P002367	ZCCHC14	zinc finger, CCHC domain containing 14	-2.56582	0.00401476
A_01_P019200	NFATC3	nuclear factor of activated T-cells, cytoplasmic, calcineurin-dependent 3	-2.56757	0.00242464
A_01_P013388	POLR3B	polymerase (RNA) III (DNA directed) polypeptide B	-2.56968	0.000562349
A_01_P004804	CACNB4	calcium channel, voltage-dependent, beta 4 subunit	-2.56984	0.00391312
A_01_P006502	LOC100425987	zinc finger protein 433-like	-2.57485	0.00344159
A_01_P009697	NCOA3	nuclear receptor coactivator 3	-2.57546	0.000654879
A_01_P011268	LOC698081	dedicator of cytokinesis protein 8-like	-2.57682	0.00291917
A_01_P004156	PKNOX1	PBX/knotted 1 homeobox 1	-2.57694	0.0026144
A_01_P011766	WRN	Werner syndrome, RecQ helicase-like	-2.57831	0.0055306
A_01_P009172	SEPT8	septin 8	-2.57874	0.00469516
A_01_P007378	AKT3	v-akt murine thymoma viral oncogene homolog 3 (protein kinase B, gamma)	-2.57877	0.00478995
A_01_P003555	SEL1L3	sel-1 suppressor of lin-12-like 3 (C. elegans)	-2.58176	0.00807824
A_01_P012680	NOSTRIN	nitric oxide synthase trafficker	-2.58344	0.000461242
A_01_P008232	SLC16A2	solute carrier family 16, member 2 (monocarboxylic acid transporter 8)	-2.58352	0.0081785
A_01_P003165	CTIF	CBP80/20-dependent translation initiation factor	-2.58364	0.00229824
A_01_P006362	PLCL2	phospholipase C-like 2	-2.58405	0.0055645
A_01_P019280	ADAMTS6	ADAM metallopeptidase with thrombospondin type 1 motif, 6	-2.58711	0.00998057
A_01_P004211	ZBTB40	zinc finger and BTB domain containing 40	-2.58712	0.000458327
A_01_P013614	UBE3C	ubiquitin-protein ligase E3C-like	-2.58775	0.00081977
A_01_P015048	LOC712303	uncharacterized protein KIAA1107-like	-2.589	0.00237931
A_01_P000553	LOC717778	probable histone-lysine N-methyltransferase ASH1L-like	-2.58914	0.0052255
A_01_P006623	ZNF169	zinc finger protein 169	-2.59126	8.09697e-05
A_01_P010055	DDX17	DEAD (Asp-Glu-Ala-Asp) box polypeptide 17	-2.5927	0.000634875
A_01_P001322	LOC699889	coiled-coil domain-containing protein 6-like	-2.5936	0.00688343
A_01_P016545	STYK1	serine/threonine/tyrosine kinase 1	-2.59716	0.00241104
A_01_P008956	MCOLN3	mucolipin 3	-2.59807	0.0086432
A_01_P000039	NR1D1	nuclear receptor subfamily 1 group D member 1-like	-2.60054	0.000922804
A_01_P015390	LHFPL1	lipoma HMGIC fusion partner-like 1	-2.6015	0.00171406
A_01_P007111	HECTD2	HECT domain containing 2	-2.60161	0.00241976
A_01_P007471	LOC100424761	eukaryotic translation initiation factor 4E-binding protein 2-like	-2.60288	0.00619933
A_01_P015833	KCNG3	potassium voltage-gated channel, subfamily G, member 3	-2.60621	0.00396068
A_01_P017437	ARHGEF18	Rho/Rac guanine nucleotide exchange factor (GEF) 18	-2.60783	0.00126773
A_01_P006947	VAPB	VAMP (vesicle-associated membrane protein)-associated protein B and C	-2.60809	0.000283032
A_01_P015399	EHBP1	EH domain binding protein 1	-2.61031	0.00407057
A_01_P017379	MPZL1	myelin protein zero-like 1	-2.61176	0.000954491
A_01_P016268	HIPK2	homeodomain interacting protein kinase 2	-2.61423	0.00766509
A_01_P005206	GTF3C2	general transcription factor IIIC, polypeptide 2, beta 110kDa	-2.6148	0.00158018
A_01_P011850	LOC712333	protein-cysteine N-palmitoyltransferase HHAT-like	-2.61857	0.00489314
A_01_P018016	WDR20	WD repeat domain 20	-2.61869	0.00764018
A_01_P004295	GPHN	gephyrin	-2.62212	0.00254809
A_01_P018405	DOCK3	dedicator of cytokinesis 3	-2.623	0.00057756
A_01_P018138	C1H1orf59	chromosome 1 open reading frame 59 ortholog	-2.62318	0.000918338
A_01_P015498	TLR6	toll-like receptor 6	-2.62384	0.0014512
A_01_P011142	RPS6KA5	ribosomal protein S6 kinase, 90kDa, polypeptide 5	-2.62387	0.00832481
A_01_P016152	MTX2	metaxin 2	-2.62861	0.000506739
A_01_P016304	TMEM164	transmembrane protein 164	-2.62893	0.00135104
A_01_P018794	GAGE8	G antigen 8	-2.63149	0.00157158
A_01_P013467	NUP43	nucleoporin Nup43-like	-2.63186	0.000683544
A_01_P017760	LOC714981	cyclic AMP-responsive element-binding protein 3-like protein 2-like	-2.63199	0.00539828
A_01_P006046	LOC704186	tumor protein D52-like	-2.63206	0.00823107
A_01_P012058	RAB11FIP2	RAB11 family interacting protein 2 (class I)	-2.63264	0.00130873
A_01_P018599	SPIN4	spindlin family, member 4	-2.63396	0.000634875
A_01_P012805	BANK1	B-cell scaffold protein with ankyrin repeats 1	-2.63612	0.00764132
A_01_P019003	LOC693884	uncharacterized protein C1orf87-like	-2.63665	0.00142005
A_01_P006480	FCHSD2	FCH and double SH3 domains 2	-2.63967	0.00753462
A_01_P014723	MB21D2	Mab-21 domain containing 2	-2.63996	0.00756493
A_01_P002890	ANKFY1	ankyrin repeat and FYVE domain containing 1	-2.6437	0.000536971
A_01_P002863	LOC704515	tRNA wybutosine-synthesizing protein 3 homolog	-2.64612	0.00258158
A_01_P003560	CEP192	centrosomal protein 192kDa	-2.64676	0.00372771
A_01_P009202	LOC715481	ras and Rab interactor 3-lik	-2.6478	0.000954613
A_01_P009607	ZNF180	zinc finger protein 180	-2.65018	0.000776237
A_01_P020096	LOC714485	s1 RNA-binding domain-containing protein 1-like	-2.6502	0.00372771
A_01_P006654	PRKCB	protein kinase C, beta	-2.65114	0.00406247
A_01_P009886	CHST14	carbohydrate (N-acetylgalactosamine 4-0) sulfotransferase 14	-2.65229	0.00384098
A_01_P015642	LOC721291	telomerase-binding protein EST1A-like	-2.65235	0.000190691
A_01_P005370	PARP1	poly (ADP-ribose) polymerase 1	-2.65324	0.0055645
A_01_P010432	LOC714735	ubiquitin-conjugating enzyme E2 variant 2-like	-2.65398	0.000227002
A_01_P008275	CPNE9	copine family member IX	-2.65543	0.00135241
A_01_P000756	POGLUT1	protein O-glucosyltransferase 1	-2.65652	0.001173
A_01_P018102	ATG5	ATG5 autophagy related 5 homolog (S. cerevisiae)	-2.65727	0.000808899
A_01_P016278	STXBP4	syntaxin binding protein 4	-2.65872	0.000353655
A_01_P013000	LRRC2	leucine-rich repeat-containing protein 2-like	-2.65959	0.00038404
A_01_P007035	PYROXD2	pyridine nucleotide-disulphide oxidoreductase domain 2	-2.66266	7.78317e-05
A_01_P006372	ZNF518A	zinc finger protein 518A	-2.66351	0.00062699
A_01_P014634	LOC698459	forkhead box protein D4-like 1-like	-2.66507	0.00533734
A_01_P007502	PAPLN	papilin, proteoglycan-like sulfated glycoprotein	-2.66678	0.00131724
A_01_P003927	MAP4K4	mitogen-activated protein kinase kinase kinase kinase 4	-2.67141	0.00227675
A_01_P011156	BOC	Boc homolog (mouse)	-2.67321	0.00627823
A_01_P004269	RBM33	RNA binding motif protein 33	-2.677	0.00346244
A_01_P007591	LOC713786	transmembrane protein 176A-like	-2.67793	0.00637419
A_01_P012274	ESPL1	extra spindle pole bodies homolog 1 (S. cerevisiae)	-2.67938	0.00152657
A_01_P017707	TMEM67	transmembrane protein 67	-2.67998	0.00450076
A_01_P004372	TRAK2	trafficking protein, kinesin binding 2	-2.6851	0.000463108
A_01_P015554	POU5F1	POU class 5 homeobox 1	-2.68819	0.00337289
A_01_P015733	LOC713205	cAMP-dependent protein kinase catalytic subunit gamma-like	-2.69016	0.00528942
A_01_P018162	FAR2	fatty acyl CoA reductase 2	-2.6919	0.00354228
A_01_P009786	GJC3	gap junction protein GJC3	-2.69306	0.00136051
A_01_P012679	LOC714992	uncharacterized protein C1orf83-like	-2.69485	0.00376611
A_01_P002297	KIAA0564	KIAA0564 protein	-2.69662	0.000302796
A_01_P007150	DOCK6	dedicator of cytokinesis 6	-2.69823	0.00156419
A_01_P002435	ZNF770	zinc finger protein 770	-2.69836	0.00205079
A_01_P005516	CRYGS	crystallin, gamma S	-2.69939	0.000634875
A_01_P006712	STARD6	StAR-related lipid transfer (START) domain containing 6	-2.6997	0.000652636
A_01_P006667	RAB3IP	RAB3A interacting protein (rabin3)	-2.70192	0.00204932
A_01_P016595	LOC100423696	hypothetical	-2.70212	0.000922804
A_01_P004663	DLG1	discs, large homolog 1 (Drosophila)	-2.705	0.00157792
A_01_P001063	PHLPP1	PH domain and leucine rich repeat protein phosphatase 1	-2.70915	0.00809427
A_01_P004191	TGM4	protein-glutamine gamma-glutamyltransferase 4-like	-2.71081	8.45138e-05
A_01_P002238	UBE2Q1	ubiquitin-conjugating enzyme E2Q family member 1	-2.711	0.000634875
A_01_P002907	C2orf44	chromosome 2 open reading frame 44	-2.71341	0.00404598
A_01_P018721	PUM2	pumilio homolog 2 (Drosophila)	-2.71537	0.00467742
A_01_P013812	ANKRD44	ankyrin repeat domain 44	-2.71588	8.45138e-05
A_01_P001945	LOC710060	sarcoma antigen 1-like	-2.71864	0.000756862
A_01_P000096	CLEC16A	C-type lectin domain family 16, member A	-2.71948	0.00635121
A_01_P003274	IKZF1	DNA-binding protein Ikaros-like	-2.72186	0.000355652
A_01_P006979	KNTC1	kinetochore-associated protein 1-like	-2.72198	0.00211977
A_01_P005282	NEK1	NIMA (never in mitosis gene a)-related kinase 1	-2.72294	0.00448733
A_01_P007194	LOC693611	zinc finger protein 729-like	-2.72294	0.000311114
A_01_P018068	HOOK3	hook homolog 3 (Drosophila)	-2.72412	0.000245708
A_01_P009900	PPEF1	protein phosphatase, EF-hand calcium binding domain 1	-2.72523	0.000708291
A_01_P020023	SMUG1	single-strand-selective monofunctional uracil-DNA glycosylase 1	-2.7255	0.00435605
A_01_P008467	POLR3A	polymerase (RNA) III (DNA directed) polypeptide A	-2.72987	0.00697259
A_01_P020162	KIF9	kinesin family member 9	-2.73421	0.000163964
A_01_P005466	ARHGEF7	Rho guanine nucleotide exchange factor (GEF) 7	-2.73442	0.00185256
A_01_P013811	ANKRD44	ankyrin repeat domain 44	-2.73446	8.45138e-05
A_01_P007344	LOC100424876	hypothetical protein LOC100424876	-2.73494	0.00790567
A_01_P009105	SCARB2	scavenger receptor class B, member 2	-2.73652	0.000918338
A_01_P001315	BRPF3	bromodomain and PHD finger containing, 3	-2.73661	0.00063887
A_01_P011001	DISP1	dispatched homolog 1 (Drosophila)	-2.73738	0.00417091
A_01_P005059	HOMEZ	homeobox and leucine zipper encoding	-2.73818	0.00404663
A_01_P000508	IQUB	IQ motif and ubiquitin domain containing	-2.73962	0.00321171
A_01_P008865	LOC100427251	G protein-coupled receptor kinase 5-like	-2.74036	0.000163964
A_01_P005936	CAMKMT	calmodulin-lysine N-methyltransferase	-2.74712	0.00110415
A_01_P001122	OTOF	otoferlin	-2.74737	0.00136852
A_01_P005381	TAF4	RNA polymerase II, TATA box binding protein (TBP)-associated factor,	-2.74945	0.00437165
A_01_P018002	ITPR2	inositol 1,4,5-trisphosphate receptor, type 2	-2.75487	0.000665578
A_01_P012828	CSAG2	CSAG family, member 2	-2.75836	0.00348553
A_01_P019901	ING5	inhibitor of growth family, member 5	-2.7643	0.00176217
A_01_P008061	GPR34	G protein-coupled receptor 34	-2.76632	0.000227679
A_01_P019043	LOC714319	TRM1-like protein-like	-2.76851	0.0034157
A_01_P010522	USP49	ubiquitin specific peptidase 49	-2.76949	0.00755263
A_01_P009059	INSRR	insulin receptor-related receptor	-2.7708	0.00312194
A_01_P013766	ZMIZ1	zinc finger, MIZ-type containing 1	-2.7737	0.00438515
A_01_P016401	OSGEPL1	O-sialoglycoprotein endopeptidase-like 1	-2.77393	0.00720438
A_01_P019202	LOC712792	growth/differentiation factor 9-like	-2.77469	0.00240475
A_01_P016804	CCDC41	coiled-coil domain containing 41	-2.77602	0.00262794
A_01_P002252	TCF20	transcription factor 20 (AR1)	-2.7798	0.00481489
A_01_P001796	SPTBN1	spectrin, beta, non-erythrocytic 1	-2.78143	0.00281324
A_01_P018400	DIP2B	DIP2 disco-interacting protein 2 homolog B (Drosophila)	-2.78181	0.00488514
A_01_P000474	NUAK1	NUAK family, SNF1-like kinase, 1	-2.78544	0.000970575
A_01_P011622	HKR1	HKR1, GLI-Kruppel zinc finger family member	-2.78612	0.000749925
A_01_P000028	GINS3	GINS complex subunit 3 (Psf3 homolog)	-2.78696	0.00750084
A_01_P010572	FBXO9	F-box protein 9	-2.78843	0.00367183
A_01_P014429	PARS2	prolyl-tRNA synthetase 2, mitochondrial (putative)	-2.78863	0.00962432
A_01_P000303	LOC100426567	zinc finger protein 271-like	-2.78897	0.00948498
A_01_P019608	LOC717748	low-density lipoprotein receptor class A domain-containing protein 3-like	-2.789	0.00944514
A_01_P004790	NAPEPLD	N-acyl phosphatidylethanolamine phospholipase D	-2.78941	0.00180661
A_01_P005908	SLC4A4	solute carrier family 4, sodium bicarbonate cotransporter, member 4	-2.79056	0.000421522
A_01_P018919	LOC711681	beta-nerve growth factor-like	-2.79074	0.00444342
A_01_P018723	LOC697066	zinc finger protein 644-like	-2.79519	0.00430671
A_01_P013181	FAM172A	family with sequence similarity 172, member A	-2.79747	0.00155192
A_01_P013330	CSF1R	colony stimulating factor 1 receptor	-2.79916	0.00956671
A_01_P012856	LOC719949	AT-rich interactive domain-containing protein 1A-like	-2.79966	0.00119237
A_01_P004239	ITGA10	integrin, alpha 10	-2.8085	8.4701e-05
A_01_P007286	CD36	CD36 molecule (thrombospondin receptor)	-2.80908	0.0015658
A_01_P019611	LOC719689	UDP-GlcNAc:betaGal beta-1,3-N-acetylglucosaminyltransferase-like protein 1-like	-2.80952	0.000392518
A_01_P017219	ZNF221	zinc finger protein 221	-2.81026	8.09697e-05
A_01_P011090	DIP2A	DIP2 disco-interacting protein 2 homolog A (Drosophila)	-2.81183	0.00182706
A_01_P013132	LOC712753	collagen alpha-1(XI) chain-like	-2.81289	0.00480299
A_01_P001591	EFHA2	EF-hand domain family, member A2	-2.81316	0.00865531
A_01_P001408	LOC709856	calcium-activated potassium channel subunit beta-3-like	-2.81319	0.00805697
A_01_P004731	PTER	phosphotriesterase related	-2.81323	0.000784743
A_01_P018012	GNAO1	guanine nucleotide binding protein (G protein), alpha activating activity polypeptide O	-2.81773	0.00833716
A_01_P009656	LOC715645	integrator complex subunit 3-like	-2.81836	0.00054181
A_01_P004310	LOC719689	UDP-GlcNAc:betaGal beta-1,3-N-acetylglucosaminyltransferase-like protein 1-like	-2.82004	0.000866645
A_01_P011768	PDZRN3	PDZ domain containing ring finger 3	-2.82104	0.00364453
A_01_P011369	VPS8	vacuolar protein sorting 8 homolog (S. cerevisiae)	-2.82112	0.00063887
A_01_P009570	SLC9A8	solute carrier family 9 (sodium/hydrogen exchanger), member 8	-2.82516	0.00301587
A_01_P008558	CD84	CD84 molecule	-2.82665	0.000197993
A_01_P010267	PRKCH	protein kinase C, eta	-2.82868	0.00537976
A_01_P003584	LOC707282	olfactory receptor 1052-like	-2.82985	0.00262312
A_01_P009350	WNK3	WNK lysine deficient protein kinase 3	-2.83031	0.00898446
A_01_P004925	DOCK10	dedicator of cytokinesis 10	-2.83235	0.00596991
A_01_P018697	ZNF585A	zinc finger protein 585A	-2.83656	0.00019161
A_01_P007630	TMEM204	transmembrane protein 204	-2.83903	0.000954613
A_01_P015280	ADAM9	ADAM metallopeptidase domain 9	-2.83954	0.00365302
A_01_P017093	LOC705778	probable Xaa-Pro aminopeptidase 3-like	-2.84886	0.00274526
A_01_P002650	C4H6orf162	chromosome 6 open reading frame 162 homolog	-2.84903	0.000824941
[truncated: 710 more rows]
